1 **Cryo-EM structures reveal two distinct conformational states in a**  
2 **picornavirus cell entry intermediate.**

3

4 Pranav N.M. Shah<sup>1†</sup>, David J. Filman<sup>1</sup>, Krishanthi S. Karunatilaka<sup>1</sup>, Emma L.  
5 Hesketh<sup>2</sup>, Elisabetta Groppe<sup>3#</sup>, Mike Strauss<sup>4</sup>, James M. Hogle<sup>1\*</sup>

6

7 **Affiliations**

8 *1. Department of Biological Chemistry and Molecular Pharmacology, Harvard Medical*  
9 *School, 240 Longwood Medical Ave., Boston, MA 02115, USA.*

10 *2. Astbury Centre for Structural Molecular Biology, School of Molecular & Cellular Biology,*  
11 *Faculty of Biological Sciences, University of Leeds, Leeds LS2 9JT, UK*

12 *3. School of Molecular and Cellular Biology, Faculty of Biological Sciences, University of*  
13 *Leeds, Leeds LS2 9JT, UK*

14 *4. Department of Anatomy and Cell Biology, McGill University, 3640 University St., Montreal,*  
15 *QC H3A 0C7, Canada*

16 *†Present Address: The Division of Structural Biology, The Henry Wellcome Building for*  
17 *Genomic Medicine, Roosevelt Drive, Oxford, OX3 7BN*

18 *#Present Address: Institute of Infection and Immunity, St George's, University of London,*  
19 *Cranmer Terrace, Tooting, London SW17 0RE, UK*

20

21 *\*Correspondence to James M. Hogle: james\_hogle@hms.harvard.edu*

22

23 **Keywords:** Poliovirus, cryo-EM, virus entry

24

25 **AUTHOR SUMMARY**

26 Nonenveloped viruses need to provide mechanisms that allow their genomes to  
27 be delivered across membrane. This process remains poorly understood. For  
28 enterovirus such as poliovirus, genome delivery involves a program of  
29 conformational changes that include expansion of the particle and externalization  
30 of two normal internal peptides, VP4 and the VP1 N-terminus, which then insert  
31 into the cell membrane, triggering endocytosis and the creation of pores that

32 facilitate the transfer of the viral RNA genome across the endosomal membrane.  
33 This manuscript describes five high-resolution cryo-EM structures of altered  
34 poliovirus particles that represent a number of intermediates along this pathway.  
35 The structures reveal several surprising findings, including the discovery of a new  
36 intermediate that is expanded but has not yet externalized the membrane  
37 interactive peptides, the clear identification of a unique exit site VP1 N-terminus,  
38 the demonstration that the externalized VP1 N-terminus partitions between two  
39 different sites in a temperature-dependent fashion, direct visualization of an  
40 amphipathic helix at the N-terminus of VP1 in an ideal position for interaction with  
41 cellular membranes, and the observation that a significant portion of VP4 remains  
42 inside the particle and accounts for a feature that had been previously ascribed to  
43 part of the viral RNA. These findings represent significant additions to our  
44 understanding of the cell entry process of an important class of human pathogens.

45

## 46 **ABSTRACT**

47 The virions of enteroviruses such as poliovirus undergo a global conformational  
48 change after binding to the cellular receptor, characterized by a 4% expansion,  
49 and opening of holes at the two and quasi-three-fold symmetry axes of the capsid.  
50 The resultant particle is called a 135S particle or A-particle and is thought to be on  
51 the pathway to a productive infection. Previously published studies have concluded  
52 that the membrane interactive peptides, namely VP4 and the N-terminus of VP1,  
53 are irreversibly externalized in the 135S particle. However, using established  
54 protocols to produce the 135S particle, and single particle cryo-electron

55 microscopy methods, we have identified at least two unique states that we call the  
56 early and late 135S particle. Surprisingly, only in the “late” 135S particles have  
57 detectable levels of the VP1 N-terminus trapped outside the capsid. Moreover, we  
58 observe a distinct density inside the capsid that can be accounted for by VP4 that  
59 remains associated with the genome. Taken together our results conclusively  
60 demonstrate that the 135S particle is not a unique conformation, but rather a family  
61 of conformations that could exist simultaneously.

62

## 63 **INTRODUCTION**

64 Poliovirus is a small (~30nm) non-enveloped, positive sense, single-stranded RNA  
65 virus. It belongs to the genus Enterovirus of the Picornaviridae, and is the  
66 causative agent of poliomyelitis [1]. The icosahedral capsid of the virus, which is  
67 made of four proteins, namely VP1, VP2, VP3, and VP4, encloses the viral genome  
68 [2]. The capsid is structurally similar to other members of the family such as  
69 Rhinovirus, Coxsackievirus A16, and Enterovirus 71 and Enterovirus D68, the  
70 latter three having caused recent epidemics of hand-foot-and-mouth disease, and  
71 even flaccid paralysis in China and the United States[1,3,4]. Therefore, studies on  
72 poliovirus are not only crucial to support the global effort to eradicate poliovirus,  
73 but also to tackle important emerging pathogens.

74

75 Poliovirus entry into cells is initiated when the virus interacts with its receptor,  
76 CD155, also known as poliovirus receptor (PVR) [5], an immunoglobulin-like  
77 molecule which is expressed at the intercellular junctions of epithelial cells [6].

78 Receptor engagement is concomitant with the loss of the “pocket factor” [7], a  
79 stabilizing ligand [8] that binds in the hydrophobic core of VP1 [9]. Structurally,  
80 receptor binding results in an icosahedral expansion of the capsid by 4% [10],  
81 resulting in a 135S, or A- particle [11-14]. These particles are metastable,  
82 infectious [15,16] and RNA-containing. Therefore, it is thought that the 135S  
83 particle represents a critical step along the pathway to infection [16]. Unlike mature  
84 native virions (160S particles), whose capsids form a closed surface, the expanded  
85 135S particles have holes in the capsid at the icosahedral 2-fold and quasi-3-fold  
86 axes. These openings permit the externalization of the hydrophobic, membrane-  
87 interactive N-terminal extension of capsid protein VP1 [11,14,17] and the  
88 myristoylated protein, VP4 [18]. *In vitro* studies with model membranes have  
89 shown that these polypeptide chains are responsible for anchoring the virus to the  
90 host cell membrane [11,19]. Earlier tomographic studies from our group  
91 demonstrated umbilical connections between the virus and receptor decorated  
92 liposomal membranes [20] were wide enough to accommodate single-stranded  
93 RNA genome. This could be the manner in which the genome is protected from  
94 the degradative effects of RNases [21]. However, the molecular and structural  
95 underpinnings of this process still remain elusive.

96

97 In the present study we report five high-resolution reconstructions of the 135S  
98 uncoating intermediate particles, with refined atomic models for four of them.

99 Taken together, our results describe a multi-step model for picornavirus capsid  
100 uncoating and subsequent steps in genome translocation.

101

## 102 **RESULTS**

103

### 104 **Three structures produced by incubation with mAb**

105

106 Initially we set out to investigate the structure of the “breathing” poliovirus particle.

107 Previous studies showed that native poliovirions, when incubated at 37°C (but not

108 at 25°C), transiently expose membrane-interactive polypeptides VP4 and the N-

109 terminus of VP1 [22]. These two exposed polypeptides could be trapped outside

110 the capsid by specific antibodies, some of which neutralized infectivity [22]. The

111 release of the antibodies by freeze-thaw restored infectivity, demonstrating that the

112 process was reversible [22]. An early attempt to characterize the breathing particle

113 trapped using an Fab that recognized residues 39-55 of VP1 [23] produced a low-

114 resolution structure [24]. This structure revealed an RNA-containing virus particle

115 whose capsid was trapped in an icosahedrally symmetric expanded state that was

116 purported to be different from previously reported expanded forms of poliovirus.

117 Weak and poorly ordered density located above the icosahedral 2-fold hole was

118 attributed to peptide-bound Fab molecules getting “stuck” in random orientations

119 when the VP1 N-terminus was partially withdrawn into the particle interior [24].

120

121 In the current study we have leveraged improvements in EM and computer

122 hardware, data collection software, and image processing pipelines to re-examine

123 with higher detail the antibody-trapped states relevant to the uncoating process,

124 starting with the poliovirus “breathing” particle. This particle was produced by

125 incubating native poliovirus with a commercially available monoclonal antibody  
126 (kind gift from Quidel Corp.) that was raised against a peptide corresponding to  
127 VP1 residues 42-55 (PALTAVETGATNPL). Although the antibodies used in this  
128 and previous studies recognize the same region of the N-terminus of VP1, this  
129 antibody differs from the one previously used, which is no longer available. Thus,  
130 in contrast to the earlier antibody which showed significant binding when  
131 incubating virus with the Fab, we could only obtain significant decoration of  
132 particles using the intact monoclonal antibody provided by Quidel. Single particle  
133 screening cryo-EM experiments were conducted to determine conditions that  
134 would yield the greatest number of virus-mAb complexes. An optimal number of  
135 complexes was observed after a 90-minute incubation of the virus at 39°C with  
136 intact (bivalent) antibody.

137

138 Under those conditions, three main structural classes were obtained (Fig. 1a),  
139 each containing roughly one-third of the usable particle images. Class 1 was not  
140 labeled by antibodies and was indistinguishable from previously solved 160S  
141 native virus [2], having an RNA core; VP4 and the N-terminus of VP1 bound on the  
142 inner surface of the capsid; and a closed protein shell that lacked large holes (left  
143 column, Fig. 1a). Classes 2 and 3 both consisted of capsids that were expanded  
144 by about 4%, with large holes at the 2-fold axes. The class 2 particles appeared  
145 to contain a full complement of RNA (middle column, Fig. 1a), whereas class 3  
146 appeared similar to previously-studied 80S empty capsids [10,25,26] (rightmost

147 column, Fig. 1a), which lack RNA, VP4, order in residues 1-68 of VP1, and which  
148 have either unobstructed or partially obstructed holes at the quasi-3-fold axes.

149

150 **The 80S-like class.** In the icosahedral reconstructions of the class 3 particles, the  
151 density for the Fab portion of the bound antibody (for simplicity we will refer to this  
152 here and in subsequent sections as the Fab) was a flat roundish feature whose  
153 connection with the capsid was not directly apparent (rightmost column, Fig. 1a).  
154 This density enclosed only the lower half of the Fab and was only visible at a much  
155 lower contour level than the capsid protein, suggesting both low occupancy, and  
156 variability in the position and angle of the Fab with respect to the virus. The  
157 position of the Fab, over the 2-fold hole, was similar to one of two sites for Fab  
158 binding in the low-resolution structure of an 80S-Fab complex described previously  
159 [27].

160

161 To further assess the interaction of the Fab with the capsid, we performed an  
162 asymmetric focused classification on 542,460 asymmetric units of the virus, using  
163 a cylindrical mask that enclosed the 2-fold axis of the capsid as well as the Fab.  
164 While the capsid was resolved to 4.2Å in the icosahedrally averaged maps, the  
165 focused class in (Fig. 1b.) resolved to 6.5Å. This class had a distinct tube-like  
166 density extending from above the VP2 helix (residues 90-100) at the 2-fold axis to  
167 the underside of the Fab (Fig. 1b). We interpret this density to be the N-terminus  
168 of VP1.

169

170 **135S-like particles (m135).** Class 2 (which we will call m135) was the most  
171 interesting of the 3 classes (Fig. 2 and middle column of Fig. 1a), as it shared  
172 several of the physical characteristics of the canonical 135S particles. The m135  
173 reconstruction was resolved to 2.8Å resolution in the capsid region, after masking  
174 and "sharpening" (see Methods) (Table S1, Fig. S1), and a detailed atomic model  
175 was constructed and refined for ordered amino acids in capsid proteins VP1, VP2,  
176 and VP3. Like a canonical 135S particle, the m135 reconstruction includes a  
177 significant central density for the RNA (but whose apparent icosahedral symmetry  
178 is an artefact of the calculation), lacks VP4 on the inner surface of the capsid, and  
179 has an expanded capsid with holes at the 2-fold and quasi-3-fold axes (middle  
180 column Fig. 1a). In this structure and in all of the remaining 135S structures  
181 described below, the pocket factor is missing from the hydrophobic pocket of VP1  
182 [9]. Similar to 135S-like particles for other enteroviruses [28,29], this structure has  
183 an additional portion of the N-terminal extension of VP1 (residues 64-69) that is  
184 ordered, and extends outward along the quasi-3-fold axis (Fig. 2b-d).

185

186 The density for the Fab is diffuse and rod-shaped, stretching between two 2-fold-  
187 related copies of the quasi-3-fold hole (Fig. 2a and middle column of Fig. 1a). The  
188 rod-like density feature is only evident above the noise level for the lower half of  
189 the Fab, which suggests variability in the position and orientation of the Fab. The  
190 weakness of the ordered Fab density (in the icosahedrally averaged maps) is  
191 consistent with a model in which specific Fab binding (to residues 42-55 of the VP1



192 N-terminus) at some of the quasi-3-fold sites near the virus surface is precluded  
193 by steric conflicts with previously bound Fabs.

194

195 In the high-resolution m135 structure, we see two general categories of structural  
196 change relative to native virus. One category corresponds to movement of the  
197 beta barrels of the major capsid proteins, VP1-3, away from one another when the  
198 capsid expands. As a consequence, several polypeptide segments (which, in  
199 native 160S virus, stabilize the "closed" capsid arrangement) detach from their  
200 neighbors and become disordered. On the inner surface of the capsid, these  
201 segments include VP4 and portions of the N-terminal extensions of VP1 and VP2.  
202 On the outer surface of the capsid, these segments include all C-termini of VP1,  
203 VP2, and VP3, as well as loops extending from the beta-barrel cores of VP1 and  
204 VP2 (see below). The general pattern of beta barrel shifts and polypeptide chain  
205 disordering that occurs upon the expansion of poliovirus has previously been  
206 analyzed [10,25,26,30]. A specific listing of ordered and disordered residues is  
207 tabulated (see Table S2) for the m135 atomic model, and for the three other atomic  
208 models described below.

209

210 The second, particularly interesting, set of structural changes involves the  
211 polypeptide segments that contact the VP1 N-terminus as it exits through the  
212 quasi-3-fold hole. Notably, the GH loop of VP3 (residues 176-185) uncoils,  
213 changing from a compact structure that plugs the quasi-3-fold in virions into a more  
214 extended structure that leaves room for residues 62-68 (residues 1-61 were not

215 modellable in this density) of VP1 to thread through the quasi-3-fold (Fig. 2c-d).  
216 Additionally, the "bottom" loop of VP2 (residues 26-58), which encircles the bottom  
217 of the VP2 beta barrel, rearranges at its tip (residues 43-55) to move out of the  
218 way of the externalizing VP1 N-terminus (Fig. 2d-e). Finally, a portion of the GH  
219 loop of VP1 (residues 216-236) rearranges to facilitate the externalization of the  
220 VP1 N-terminus; and the C-terminal extension of VP2 (residues 262-272) retracts  
221 from its position on the outside of the virion to bind to the inner surface of the capsid  
222 (Fig. 2f). The movement of the VP1-3 beta barrels is strikingly consistent with all  
223 of the 135S structures reported here and in those previously published for  
224 poliovirus and other enteroviruses [17,25,30-32](see ordered residue lists, Table  
225 S2). In particular, the four key contact areas (Fig. 2c-f) either change their  
226 conformation or become disordered as a result of the 160S-to-135S conversion.

227

228 Finally, we considered the possibility that our antibody-trapped "breathing"  
229 particles would regain infectivity if the antibody were released by freeze-thawing,  
230 as was reported in the original report of "breathing" of poliovirus [22]. To test this  
231 possibility, virus samples were incubated with VP1 antibodies either at 39°C  
232 (where breathing is expected) or 25°C (where breathing is not expected) for 1.5 h  
233 (the same as for the EM experiment) and immunoprecipitated with Protein A/G  
234 coated magnetic beads at room temperature. Unbound virus was washed away,  
235 and the bound virus was released from the beads by freeze-thawing the solution.  
236 Next, the released virus was serially diluted and used to infect naïve Vero cells.  
237 Greater cytopathic effect was observed in virus particles retrieved from incubating

238 the virus with the antibody at higher temperature than the virus particles retrieved  
239 from the room temperature incubation (Fig S2a-b). This suggests that some of the  
240 antibody-bound particles must have retained a full or nearly full complement of  
241 proteins (presumably including VP4) and remained infectious, even when  
242 accounting for non-specific binding of native virus to the antibody.

243

#### 244 **Comparison of m135 particles with “canonical” 135S particles.**

245

246 Historically, three methods were used to convert 160S virus to 135S particles, and  
247 the resulting particles were not distinguishable by any of the tests then available.  
248 One method involved the binding of virus by the poliovirus receptor at the cell  
249 surface at 37 °C in a natural infection [11-13]; the second involved incubation of  
250 virus with the soluble ectodomain of the receptor at 37°C [33,34]; and the third  
251 involved heating 160S particles at 50°C in the presence of divalent cations that  
252 stabilize the meta-stable 135S intermediate [11,15,35]. To assess whether or not  
253 the m135 particle was indeed 135S-like, we decided to solve cryo-EM structures  
254 for both the soluble-receptor-triggered and heat-triggered 135S particles.  
255 Consistent with our "standard recipes" for producing 135S particles [8,15], we  
256 incubated native virus for 3 min, either with solubilized PVR at 37°C, or alone at  
257 50°C. Receptor-triggered and heat-triggered 135S structures (designated "r135"  
258 and "h135", respectively) were solved at 3.2Å resolution (after density-based  
259 masking and sharpening) (Table S1, Fig. S1b-c).

260

261 As expected, the capsids of both r135 and h135 were expanded by 4%, with holes  
262 at the 2-fold axes, were full of RNA, and failed to show well-ordered native-like  
263 VP4 pentamers lying flat on the inner surface of the capsid (Fig. 3a). The r135 and  
264 h135 structures were identical, except for the occasional shift, by one or two  
265 residues along the polypeptide chain, where an order-to-disorder transition  
266 occurred. The set of "buildable" residues whose main chain atoms could be  
267 included in each atomic model are listed in Table S2.

268

269 Surprisingly, both r135 and h135 maps lacked a visible extension of the VP1 N-  
270 terminus through the quasi-3-fold hole, which was supposed to be the structural  
271 hallmark of a 135S particle, according to the literature [11,17,30,36]. In both cases,  
272 residue 69 was the first ordered residue of VP1; residues 43-53 of the bottom loop  
273 of VP2 (which supports the VP1 N-terminus) were disordered; and the quasi-3-fold  
274 hole was partially blocked by the GH loop of VP3 (Fig. 3b). The lower portion of  
275 the loop was similar to that seen in native 160S virus (Fig. 3c), but the upper portion  
276 was different from either the 160S structure or previously described 135S  
277 structures in which the VP1 N-termini were exposed. In short, while the  
278 literature[17,29,32] (and our own experience [14]) had led us to expect a 3 min  
279 incubation to produce an expanded particle with the VP1 N-termini extended, the  
280 3 min incubation in this study produced an expanded and fenestrated capsid in  
281 which most or all of the VP1 N-terminus remained inside the capsid. Therefore, we  
282 propose that the category of particles that was previously called "135S" most likely  
283 consists of distinct states, namely, an "early state", wherein the capsid has

284 undergone an expansion but most copies of the VP1 N-terminus are on the inside  
285 of the capsid and the quasi-3-fold hole still remains blocked, and a subsequent  
286 “late state”, characterized by the opening of the quasi 3-fold hole and the  
287 emergence of many copies of the VP1 N-termini through them. In support of this  
288 possibility, a careful re-reading of the literature [9,15,22,36] showed that 135S  
289 particles with extended N-termini were typically detected only after extensive  
290 purification and/or prolonged incubations.

291

### 292 **Receptor-induced 135S particles incubated with mAb at 25°C**

293

294 To test our hypothesis, that VP1 N-termini (from expanded particles) become  
295 externalized after an extended time, we followed the method described in Tsang  
296 et al [37], first incubating the virus with receptor for 3 mins at 37°C, followed by a  
297 1hr incubation with antibody at 25°C. This protocol was carried out twice, once with  
298 a smaller "screening" data set, and once with a larger one. Data collection  
299 parameters are summarized in Table S1.

300

301 As predicted, incubation of the pre-formed "early 135S particle" with antibody for  
302 1hr at 25°C did decorate the virus particles with Fab-shaped density features. (Fig.  
303 4a). Surprisingly, the Fab portions of the antibody molecules did not bind at quasi-  
304 3-fold positions, to produce a low-level rod-shaped density, such as that seen in  
305 the m135 map (Fig. 2a and Fig 1a middle column). Instead, the Fab density in the  
306 icosahedrally-averaged map was poised above the 2-fold hole. Its position was

307 similar to that of the much weaker hemispherical density in the decorated 80S  
308 particles (rightmost column, Fig. 1a). However, in the new "r135+m25"  
309 reconstruction, density for the Fab was much better ordered, with the upper half of  
310 the Fab domain visible, and separated from the lower half by an appropriately  
311 placed gap in the density between subdomains (Fig. 4b). Unlike the decorated 80S  
312 map, where the Fab may have been freely spinning around the viral 2-fold axis,  
313 here the Fab appears to have a preferred orientation, with each of its two hinges  
314 sitting on a (partly disordered) EF loop of VP2. (Note that the Fab envelope is a  
315 sufficiently low-resolution feature that imposing an icosahedral twofold operation  
316 on the Fab density envelope had only a minimal effect on the density shape). The  
317 density for the Fab being weaker than that of the capsid can be attributed, at least  
318 in part, to the fact that at most 30 copies of the Fab can bind the virion over the 2-  
319 fold axis. Both the contour level needed to visualize the Fab and the quality of fit  
320 of this density to the Fab model indicated higher occupancy and more structural  
321 consistency in this complex than we saw in our other complexes with Mab.

322

323 In the r135+m25 icosahedrally averaged map, and in all of the focused classes  
324 that were calculated from the r135+m25 image stack, we looked under the bottom  
325 surface of the Fab, trying to find density for a peptide connection (perhaps similar  
326 to the density connections that we saw in the focus classes of antibody-decorated  
327 80S particles (Fig. 1b)). Instead, the bottom surface of the Fab (above the 2-fold  
328 axis) consistently lacked an obvious connection; and the 2-fold hole was occupied  
329 by a density that we tentatively identify as the partially retracted C-terminus of VP2

330 (Fig. 4b). In contrast, in focused classifications centered on the 2-fold axis,  
331 including the quasi-3-fold holes, we observed 61% of the asymmetric particles  
332 exhibiting a clear density for the N-terminus of VP1 emerging from the quasi 3-fold  
333 hole (Fig. 4c), with the GH loop of VP3 in an extended conformation as described  
334 in the m135 model (Fig. 2c.).

335

336 **Visualizing the exposed N-terminal helix of VP1.** Interestingly, we observed a  
337 focused class for the screening data comprising of 21% of the 966,840 asymmetric  
338 units of the virus where the lower half of the Fab contacts both VP2 shoulders, but  
339 asymmetrically tilts towards one of the shoulders (Fig. 4d). This causes the top  
340 half of the Fab to become less well ordered compared to the lower half of the  
341 molecule. In this class, the tilted Fab leans against a long, straight, upward-  
342 projecting density feature. The projecting density is unusual in its appearance with  
343 one wide dimension and a flat dimension (Fig. 4d).

344 The observed shape of the density closely matches the shape of an idealized alpha  
345 helix built with the sequence of the first 20 residues of VP1 (the amphipathic  
346 character of this helix is known to be evolutionarily conserved [11]). The helical  
347 density observed in our map (Fig. 4d) appears on the top surface of the VP2 EF  
348 loop, in the same location that a difference density peak was previously observed  
349 between low-resolution structures of V8 protease treated and untreated 135S  
350 particles [31] (Fig. S3b). Similar column-like density features were seen in some  
351 of our other focus classes, but the density was never quite as convincing as it was  
352 in this example.

353

354 Taken together these data suggest that the Fab in r135+m25 particles is bound to  
355 a copy of the VP1 N-terminus that has exited at a nearby quasi-3-fold axis, and its  
356 location above the 2-fold hole is determined by interactions of the framework  
357 region of the Fab and the extreme N-terminal residues of VP1 with the VP2 GH  
358 loops.

359

360

### 361 **Receptor-induced 135S particles incubated with mAb at 37°C**

362

363 To account for the difference in the binding pattern of the Fab between the m135  
364 and r135+m25 reconstructions, we postulated that lowering the temperature had  
365 an effect on the pattern of Fab binding. To that end the experiment was performed  
366 in the same manner as the r135+m25 conditions, except that the temperature for  
367 incubating with antibody was maintained at 37°C. The Fab density that was  
368 observed (Fig. 5a-b) appeared to be a superposition of the m135 and r135+m25  
369 binding patterns. Thus, the density for the Fab is rod-like (as it was in the m135  
370 reconstruction), but there is also significant density above the 2-fold axis which  
371 includes density corresponding to the upper half of the Fab (as was observed in  
372 the r135+m25 reconstruction). The reduced occupancy of well-ordered Fab  
373 molecules at the 2-fold site (in r135+m37, relative to r135+m25) suggests that the  
374 higher temperature of incubation with antibody destabilizes the interaction of Fab  
375 with the VP2 GH loop. As was the case in the m135 structure, the r135+m37



376 reconstruction has readily interpretable density for the VP1 N-terminus exiting at  
377 the quasi-3-fold hole. Given that the r135+m37 map appears to be a lower-  
378 resolution (see Table S1) superposition of two better-determined structures, and  
379 not relevant to biological infection, we elect not to report an atomic model for it.

380

### 381 **Possible pentamers of capsid protein VP4.**

382

383 The small myristoylated capsid protein VP4 [18], is believed to play an important  
384 role in the protection of viral RNA (as RNA crosses the gap between virus and  
385 membrane) and in the penetration of host cell membranes[38,39]. In 160S virions,  
386 prior to capsid expansion, pentamers of poliovirus VP4 lie flat on the inner surface  
387 of the capsid, cupping the VP3 beta tube in a ring of five myristates [9,18] (Fig. 6,  
388 leftmost panel). The N-terminal residues (1-45) of VP4 intertwine in a pinwheel  
389 arrangement to form a 60Å diameter disk, while the C-terminal residues (46-70)  
390 extend away from the disk, towards the 3-fold axes, in a 5-pointed star  
391 arrangement [2]. In contrast, in 80S empty capsids, most if not all of the RNA is  
392 gone and there is no density for VP4 [25,26] (Fig. 6, rightmost panel). But what  
393 happens to VP4 in between those initial and final states?

394

395 Our five high-resolution structures of 135S-like particles offer some intriguing  
396 indications that many of the VP4 pentamers may, indeed, remain intact within the  
397 virus capsid, with their distances from the protein shell increasing as the capsid  
398 shifts outward. Like many other 135S-like expanded picornavirus structures, our

399 maps show a distinct 10Å-thick layer on the outer surface of the unstructured RNA  
400 density (top row center of Fig. 1a, and Fig. 3a right). Although this layer has  
401 commonly been attributed to RNA [29,32], we believe that its shape and  
402 dimensions are consistent with VP4 (see below).

403

404 In "early 135S particles" (i.e. expanded but with the VP1 N-terminus mostly inside),  
405 as seen in the "r135" and "h135" structures, the putative VP4 density is consistently  
406 cup-shaped in profile (Fig. 6 second panel from left). Seen face-on, the density  
407 feature has a radial position and a diameter similar to that of a native VP4  
408 pentamer. Like VP4 pentamers, the density feature is around 10Å thick (which is  
409 much too thin to be duplex RNA). As in native virus, the center of the cup (near the  
410 5-fold axis) contacts the VP3 beta tube; but further from the 5-fold axis, unlike  
411 native virus, the density is seen to curve away from the capsid (as if it were peeling  
412 off of the inner surface of the capsid). Notably, the shape of the density is  
413 pentagonal, with a large central hole, which differs from the star-shaped density of  
414 the native pentamer. This would require some concerted conformational change  
415 to occur as the pentamer detached.

416

417 In the "late 135S particles" (expanded, with the VP1 N-terminus mostly  
418 externalized), as seen in the m135, r135+m25 and r135+m37 data sets, the cup-  
419 shaped density feature is slightly flatter, and is positioned slightly further away from  
420 the inner capsid surface (at ~14Å) (Fig. 6, third panels from left).

421

422 These results are consistent with claims from published literature (15, 40) in which  
423 VP4 was detected biochemically in preparations of 135S particles. Moreover,  
424 because VP4 plays a key role in viral infection [40], at least some VP4 must remain  
425 present in 135S particles to explain the observation that these particles remain  
426 infectious [15,16]. Therefore, we conclude that the thin layer immediately adjacent  
427 to the capsid that has previously been attributed to RNA is more likely to be  
428 residual VP4 that is not externalized until the RNA genome is released.

429

#### 430 **Discussion.**

431

432 Picornavirus cell-entry is still an area of active research. In the present study we  
433 have gained further insight into the dynamics of the expanded genome-containing  
434 infectious intermediate of poliovirus, which is known as the 135S particle.  
435 Importantly, we show that the 135S particle, which was thought to be a unique  
436 structure, is instead an ensemble of structures, that expansion is not completely  
437 coupled to externalization the N-terminal extension of VP1 as previously thought,  
438 and that a significant fraction of VP4 remains in partially occupied but well-ordered  
439 structures on the inner surface of the particle.

440

441 **Decoupling expansion and externalization of the VP1 N-terminus** – One of the  
442 unexpected findings of the current study was the observation of 135S particles  
443 which were expanded but had not externalized the VP1 N-terminus. Thus in the  
444 r135 and h135 structures, where the 135S particles had been prepared by

445 protocols that were believed to result in both expansion and externalization of the  
446 VP1 N-terminus, icosahedrally averaged maps showed that the VP3 GH loop was  
447 in a conformation that blocked the hole at the quasi-3-fold axes and there was no  
448 detectable density for the VP1 N-terminus. This observation contrasts with  
449 biochemical studies that show that the VP1 N-terminus was accessible to  
450 proteases and to antibodies and with earlier structural studies of 135S particles of  
451 poliovirus and other enteroviruses. Indeed, we observed weak but significant  
452 density for the externalized VP1 N-terminus in a recent intermediate resolution  
453 (5.5Å) structure of the 135S particles that were prepared by the same heating  
454 protocol [30]. To address this apparent discrepancy, we tried applying our current  
455 cryoEM software protocols for classification and data processing to the older lower-  
456 resolution data set and produced a fenestrated reconstruction that lacked  
457 significant density for the VP1 N-terminus (data not shown). We conclude that the  
458 samples that produced both structures contained a mixture of structures and that  
459 the methods used to select particles to be included in the earlier lower-resolution  
460 reconstruction resulted in enrichment in a minority population of particles with the  
461 VP1 N-terminus exposed.

462

463 **Where does the VP1 N-terminus exit the virion** - Previous structural and  
464 biochemical characterization of the 135S particle of poliovirus (and other related  
465 picornaviruses) using cryoEM, crystallography, and antibody studies, led to a  
466 model wherein, upon expansion, the N-terminus of VP1 initially exits via the 2-fold  
467 hole, and later gets locked into the quasi-3-fold channel through a “gear-shift”

468 motion[17,24,27,30]. However, in none of our recent panel of structures did we  
469 observe evidence for such a motion. Instead, the density for the N-terminus of VP1  
470 in 135S particles, whenever it was externalized and trapped by an antibody, was  
471 consistently observed to occupy the quasi-3-fold channel. Although we cannot rule  
472 out a model in which VP1 transiently exits via a hole at the 2-fold axis during the  
473 dynamic process of externalization, our recent maps suggest that any such  
474 externalized polypeptide is either quickly re-internalized, or quickly migrates to the  
475 quasi-3-fold axis. It is also worth noting that even after a long incubation with the  
476 monoclonal antibody (m135, r135+m25, and r135+m37), in all cases densities for  
477 the VP1 N-terminal extension and for the antibody were consistently weaker than  
478 capsid, which suggests that some VP1 N-termini may remain inside the capsid.

479

480 **A revised model for the virus-to-135S transition.** Taken together our current  
481 results suggest a process with three major steps. First, upon binding to the  
482 receptor at 37°C or exposure to high temperature (50°C) the virus expands and a  
483 significant fraction of VP4 is externalized. This step is concomitant with the loss  
484 “pocket factor” and of internal and external stabilizing interactions among  
485 neighboring protomers through their N- and C-termini and loops on the outer  
486 surface. In a second step, the residues in the VP1 N-terminus are then reorganized  
487 such that residues 69-64 run up through the quasi-3-fold. It is clear that this second  
488 step must happen during infection because biochemical studies show that the VP1  
489 N-terminus is inserted into membranes in *in vitro* models [11,19] and during  
490 infection, and plays a key role in the late stages of viral entry [41]. We would argue,

491 however, that the externalization of the VP1 N-terminus is transient and reversible  
492 on the time scales relevant to infection (minutes) and that exposure of a significant  
493 fraction of the VP1 N-termini on this time scale requires the presence of a trap.  
494 Trapping agents could include cellular membranes during infection [11,15],  
495 liposomes in *in vitro* model systems [11,19,20], or antibodies that bind the VP1 N-  
496 terminus once exposed [22,24]. In order to explain the observation of stable  
497 structures in which the VP1 N-terminus is clearly externalized, we postulate a third  
498 step in which the VP1 N-terminus slowly becomes locked on the outside of the  
499 capsid even in the absence of trapping agents, perhaps by forming stable  
500 interactions with the GH loops of VP3 and VP1, as seen in the m135 structure, in  
501 our previous intermediate-resolution reconstruction of the poliovirus 135S  
502 particle[30], and in the structures of the 135S particles of other enteroviruses  
503 [17,29,42]. What proportion of the N-termini are exposed in 135S particles, during  
504 natural infections, in the presence of cellular membranes, is now an open question.

505

506 **Wither the VP1 N-terminus after leaving the capsid.** Although it is clear that  
507 residues 69-64 of the VP1 N-terminus exit the capsid at the quasi-3-fold, the  
508 course of the externalized residues 1-61 that are distal to the exit point is less clear.  
509 In all of our structures, residues 61-56 are disordered. Based on where Fab  
510 density is seen, residues 55-42 (which constitute the antibody binding site) can be  
511 located either above a 2-fold axis (r135+m25), or above a  
512 quasi-3-fold axis (m135), or both (r135+m37). Finally, the results from an earlier  
513 low-resolution structure of the 135S particles [31] and the clear density

514 amphipathic helix of VP1 in the r135+m25 structure reported here demonstrates  
515 that a significant fraction of the first 20 amino acids of VP1 can bind at the top of  
516 the EF loop of VP2. These results are summarized in Fig. 7.

517

518 **Significance of the amphipathic helix of VP1.** Earlier studies from our  
519 group[11,19] demonstrated the externalization of the VP1 N-terminus and  
520 described its role in the binding of 135S particles to membranes. Using floatation  
521 assays and V8-protease-based cleavage of the 135S particles, the membrane-  
522 interacting part of the peptide was localized to the first 30 amino acids in the  
523 sequence[11,19]. Further analysis predicted that the first 20 amino acids would  
524 adopt a helical conformation[11], with the helix having a hydrophobic and a  
525 hydrophilic side (a common membrane-interactive structural motif). Subsequently,  
526 single particle cryoEM analysis of V8-cleaved and uncleaved 135S particles[36]  
527 suggested that the externalized VP1 N-terminus would sometimes be anchored on  
528 top of the VP2 EF-loop. However, the density for the amphipathic helix had never  
529 been visualized directly. In the present study, we were fortunate to be able to  
530 visualize clear density for the entire helix, and to confirm that the helix is located in  
531 the same location that the V8-cleavage difference density from an earlier study  
532 [31] had predicted it to be (Fig. 4d, Fig. S3b). The fact that the helix is only clearly  
533 visible in focused reconstructions from the screening data set suggests that the  
534 interactions between the helix and the VP2 may be weak. However, we speculate  
535 that, even if the localization of the helix at the tip of the VP2 EF loop is transient at  
536 physiological temperature, by increasing the number of copies of the N-termini at

537 a higher elevation on the virus particle, this interaction may drive the association  
538 with membrane, may facilitate engulfment of the virus particle at the cell surface  
539 and internalization into endosomes [43], and may serve as an asymmetric trigger  
540 for the translocation of the genome into the cytosol [20]

541

542 **Difference in antibody density under different conditions.** Another puzzling  
543 aspect of the structures presented here is the observation that the Fab in the  
544 complexes produced by incubating with PVR at 37°C then with antibody at 25 °C  
545 binds above the 2-fold hole, whereas the complexes produced during higher-  
546 temperature incubations showed Fab density above the quasi-3-fold axes. A likely  
547 explanation for our observations is that some of the N-termini of VP1 become  
548 externalized via the quasi-3-fold hole during the initial 3-min. incubation with  
549 receptor at 37°C, and their N-terminal helices find the binding site on the VP2 EF  
550 loop, where they remain trapped once the temperature is lowered to 25°C. Upon  
551 subsequent incubation with antibody at room temperature, this configuration is  
552 further stabilized by nonspecific contacts between the antibody, the VP1 N-  
553 terminal helix, and the VP2 EF loops. In the maps (Fig. 4a-b), this binding mode  
554 manifests as a well-ordered density that recognizably corresponds to both halves  
555 of the Fab portion of the antibody.

556

557 In contrast, when the particles are maintained at 37°C or 39°C during antibody  
558 binding, the higher temperature reduces the stability of the specific interactions of  
559 the VP1 N-terminal helix with the VP2 EF loop, the nonspecific interactions of the



560 hinges of the Fab with the VP2 EF loop “shoulders”; and the nonspecific  
561 interactions of the VP1 helix with the sides of the Fab. Thus, the 2-fold binding of  
562 Fab was reduced at 37 °C, and almost eliminated at 39°C. Instead, a greater  
563 proportion of the Fab moieties were bound closer to the quasi-3-fold hole, where  
564 Fab orientations were less well-constrained, and the Fab density was  
565 consequently more diffuse.

566

567 **Presence of VP4 in an expanded particle.** VP4 is a myristoylated, pore-forming  
568 protein that is implicated in the translocation the RNA genome across  
569 membranes[18,38,40]. This protein was thought to be completely lost after  
570 conversion to the 135S state[11-13]. However, biochemical and infectivity assays  
571 indicate that at least 25% of VP4 remains associated with the virus particle, and  
572 that the 135S particle remains infectious[15,44] (Fig. 6b and Fig. S2). In several  
573 related picornaviruses, reports of expanded virus structures have noted the  
574 disappearance of VP4 from the inner surface of the capsid, and have attributed all  
575 of the unstructured density inside of the capsid to RNA, including a thin 10Å-thick  
576 layer at the periphery of the icosahedrally-averaged "RNA ball"[29,32]. However,  
577 in our panel of expanded genome-containing structures, we can alternatively  
578 account for the density under the 5-fold peak using a native atomic model of the  
579 VP4 pentamer (Fig. 6). Moreover, an unmistakable gradual curving of the VP4  
580 layer away from the capsid, peeling off of the inner surface, was seen in the r135  
581 and h135 structures (Fig. 6.) that is remarkably similar in appearance to the density  
582 that has been ascribed to RNA in previous studies with other enteroviruses[29,32]

583 . VP4 has the capacity to bind to RNA[45] and perhaps that is the reason it is being  
584 held in place (at its original radius in native virus) while the rest of the capsid  
585 expands radially. Nevertheless, it remains unclear how VP4, thus separated from  
586 the capsid, possibly still associated with RNA, and with pentamers intact or not,  
587 manages to exit the capsid and to embed itself in the membrane. This will be an  
588 important avenue to explore in understanding the crucial genome-translocation  
589 step in picornavirus infection.

590

## 591 **Materials and Methods**

592

### 593 **Virus and antibody.**

594 Poliovirus type 1 Mahoney strain was purified by infecting Hela S3 suspension  
595 cells at an MOI=10 for 6hrs at 37°C. Infected cells were spun down, washed with  
596 phosphate buffered saline (PBS:137 mM NaCl, 2.7 mM KCl, 1.1 mM KH<sub>2</sub>PO<sub>4</sub>, 6.5  
597 mM Na<sub>2</sub>HPO<sub>4</sub>, 0.7 mM CaCl<sub>2</sub>, 0.5 mM MgCl<sub>2</sub>) and frozen at -80°C. Virus was  
598 released from the cells by repeated freeze-thawing of the infected cell pellet in  
599 RSB buffer (10mM Tris pH 7.3, 10 mM NaCl, 1.5 mM MgCl<sub>2</sub>, 1% IGEPAL CA-630)  
600 and clarification of the cell debris through centrifugation. The virus was pelleted  
601 through ultracentrifugation and layered on a CsCl density gradient. Subsequently,  
602 the virus band was collected and dialysed against PBS before being flash frozen  
603 in liquid nitrogen and stored at -80°C.

604

605 The anti-VP1 monoclonal antibody (one of two monoclonal antibodies in a pan-  
606 Enterovirus ELISA detection kit) was obtained from Quidel (Athens, Ohio).

607

### 608 **Plaque Assay**

609 Vero cells were grown in 6-well plates until confluency at 37°C and 5% CO<sub>2</sub>. The  
610 cells were then infected with serial dilutions of poliovirus. At 36 h post-infection  
611 cells were fixed with 10% formaldehyde and stained with 0.1% crystal violet.

612

### 613 **In vitro generation of poliovirus 135S and 135S-like particles**

614 Anti-VP1 antibody triggered 135S-like particles were generated by mixing 18μL of  
615 virus suspension (0.4mg/ml) with 3μL of anti-VP1 antibody (3.2mg/ml) and  
616 incubated for 1.5 h at 39°C in a thermal cycler. To generate 135S particles, PV  
617 suspension was first buffer exchanged into a low salt buffer (20mM Tris-Cl pH 7.5,  
618 2mM MgCl<sub>2</sub>). The receptor-triggered conversion of PV was induced by mixing  
619 18.6μL of PV (0.5mg/ml) with 0.4μL of PVR/CD155 (6.1mg/ml) on ice before  
620 incubating at 37°C for 3 min. The reaction was quenched on ice. Heat-triggered  
621 135S particles were generated by heating native PV (in the low salt buffer) to 50°C  
622 for 3 minutes, before quenching the reaction on ice. The r135+m25/37 particles  
623 were produced by incubating PV with PVR, as described above, followed by the  
624 addition of the anti-VP1 mAb (150x molar excess over virus) and incubation at  
625 25°C or 37°C for 1 h.

626

### 627 **Cryo-Electron Microscopy and data collection**

628 Carbon-backed lacey grids (Ted Pella) were glow discharged in an easiGLO  
629 (PELCO, Fresno, California) glow discharge unit by applying a current of 15mA for  
630 30s. To the freshly glow-discharged grids, 3.0-3.5 $\mu$ L of virus or virus-ligand mixture  
631 was applied. The samples were then allowed to adsorb on the grid for 30s before  
632 blotting away the excess buffer using a blot force of 6 and blot time of 6s in a FEI  
633 Vitrobot Mark IV (ThermoFisher). The grids were plunge frozen in a liquid ethane  
634 slush and stored in liquid nitrogen until imaging. Data collection parameters are  
635 listed in Table S1.

636

### 637 **Image processing**

638 Image processing of micrographs was performed within Relion 3.0 [46]. Individual  
639 movie frames were aligned and dose-weighted with the Relion implementation of  
640 motion correction by applying a negative B-factor of -150 [47]. CTF parameter  
641 estimation was performed using Gctf v1.06 [48] on dose-weighted micrographs.  
642 Particle-picking was performed in crYOLO[49] by training the neural network on an  
643 initial subset of ~300 manually picked particles from several micrographs sampling  
644 a range of defocus values. Subsequently, the particle picker was deployed on the  
645 complete dataset to identify and save particle co-ordinates which were then  
646 imported into Relion. The picked particles were extracted, binned by 4 and  
647 subjected to a single round of 2D classification and obviously junk classes were  
648 discarded prior to 3D classification. The particle stack was refined against a  
649 representative class obtained at the end of the 3D classification. After the first  
650 round of refinement, the dataset was subjected to CTF refinement [46] by

651 estimating beam tilt, per-particle defocus and astigmatism followed by Bayesian  
652 polishing [46] with default parameters. Icosahedral symmetry was imposed in  
653 every round of refinement and the reference model was filtered to 60Å to prevent  
654 model bias. The final resolution (0.143 gold standard FSC) of the structures (Table  
655 S1) was obtained through the Postprocessing job type in Relion, where a density-  
656 based mask enclosing the capsid was applied to estimate the FSC between two  
657 independently processed half datasets. Local resolution estimates were also  
658 obtained by running the Relion's implementation of local resolution algorithm.

659

#### 660 **Asymmetric focused classes**

661 After assignment of icosahedral orientations to the particle images, a cylindrical  
662 mask was prepared using SPIDER[50] with a diameter of 105Å, centered on the  
663 viral 2-fold and enclosing two copies of the quasi 3-fold axis. The initial height of  
664 475Å was then limited to a spherical shell by applying minimum cutoff at 154Å.  
665 Then, using `relion_particle_symmetry_expand` a new STAR file containing 60  
666 icosahedrally related orientations for each particle in the stack was generated. This  
667 symmetry expanded stack was then subjected to a masked 3D classification  
668 routine in which orientational and translational searches were disabled, the T-value  
669 was set to 40, and 5 density classes were generated.

670

#### 671 **Model building and refinement**

672 A starting model for m135 was assembled from 1HXS and previously published  
673 high-resolution structures of the expanded poliovirus structures [25,51] were

674 docked into the density using COOT [52]. Where none of the pre-existing models  
675 for the density fit well, the segments were constructed *de novo*.  
676 Models were iteratively built and refined in REFMAC5 and/or phenix\_refine and/or  
677 phenix\_real\_space\_refine, until no further improvement was possible [53-55]. To  
678 avoid model bias, the Fourier transforms of the experimental maps (both  
679 amplitudes and phases) were used as refinement standards. The model included  
680 a central protomer (VP1, VP2, and VP3) and neighboring proteins related by  
681 icosahedral symmetry. Strong restraints were included for stereochemistry,  
682 symmetry, and temperature factors.

683

#### 684 **Data Availability**

685 Cryo-EM maps and masks for m135, r135, h135, r135+m25 and r135+m37  
686 conditions are deposited in the EMDB with accession codes EMD- 20275, EMD-  
687 20276, EMD-20469, EMD-20546 and EMD-20474 respectively. Atomic co-  
688 ordinates for all the maps except r135+m37 can be accessed from the PDB with  
689 the following codes 6P9O (m135), 6P9W (r135), 6PSZ (h135), 6Q0B (r135+m25).  
690

#### 691 **Figure preparation**

692 Figures and illustrations were prepared using PyMol (Schrödinger, LLC), Chimera  
693 [56], ChimeraX [57] sourced through the SBGrid Consortium[58] and compiled in  
694 Adobe Illustrator (Adobe, USA)

695

#### 696 **Acknowledgements.**

697 We would like to thank Drs. Lawrence Shapiro and Oliver Harrison (Columbia  
698 University) for providing us with PVR, Sara McCoy (Quidel) for providing the anti

699 VP1 antibody, Dr. David Bhella (University of Glasgow) and Dr. Simon Jenni  
700 (Harvard University) for helping us run the asymmetric focused classification. We  
701 would also like to thank members of the SBGrid team for maintaining the  
702 computing environment. Dr. Takanori Nakane (MRC-LMB) is acknowledged for  
703 sharing the code to plot the resolution distribution in 3D volumes. We would like  
704 to acknowledge the Astbury Biostructure Laboratory (ABSL) for Titan Krios cryo-  
705 EM data collection which was funded by the University of Leeds and the  
706 Wellcome Trust (108466/Z/15/Z) as well as the Harvard Cryo-EM Center for  
707 Structural Biology This study was supported by an NIH grant (AI020566) to  
708 J.M.H.

709

710

### 711 **Author Contributions.**

712 Conceived and designed the experiments: JMH, MS, DJF, PNMS, KK.

713 Performed the experiments: PNMS, KK, EH, EG. Analysed the data: PNMS,

714 DJF, JMH. Wrote the paper: DJF, PNMS, JMH, MS.

715

716

### 717 **References**

718

- 719 1. Ryu W-S. Chapter 11 - Picornavirus. In: Ryu W-S, editor. *Molecular*  
720 *Virology of Human Pathogenic Viruses*. Boston: Academic Press; 2017. pp.  
721 153–164. doi:<https://doi.org/10.1016/B978-0-12-800838-6.00011-4>
- 722 2. Hogle JM, Chow M, Filman DJ. Three-dimensional structure of poliovirus at  
723 2.9 Å resolution. *Science* 229:1358-1365.
- 724 3. Ayers T, Lopez A, Lee A, Kambhampati A, Nix WA, Henderson E, et al.  
725 Acute Flaccid Myelitis in the United States: 2015-2017. *Pediatrics*.  
726 2019;144: e20191619. doi:10.1542/peds.2019-1619
- 727 4. Sejvar JJ, Lopez AS, Cortese MM, Leshem E, Pastula DM, Miller L, et al.  
728 Acute Flaccid Myelitis in the United States, August-December 2014:  
729 Results of Nationwide Surveillance. *Clin Infect Dis*. 2016;63: 737–745.  
730 doi:10.1093/cid/ciw372
- 731 5. Mendelsohn CL, Wimmer E, Racaniello VR. Cellular receptor for poliovirus:  
732 molecular cloning, nucleotide sequence, and expression of a new member  
733 of the immunoglobulin superfamily. *Cell*. 1989;56: 855–865.  
734 doi:10.1016/0092-8674(89)90690-9
- 735 6. Takai Y, Irie K, Shimizu K, Sakisaka T, Ikeda W. Nectins and nectin-like  
736 molecules: roles in cell adhesion, migration, and polarization. *Cancer Sci*.  
737 John Wiley & Sons, Ltd (10.1111); 2003;94: 655–667. doi:10.1111/j.1349-  
738 7006.2003.tb01499.x

- 739 7. Strauss M, Filman DJ, Belnap DM, Cheng N, Noel RT, Hogle JM. Nectin-  
740 like interactions between poliovirus and its receptor trigger conformational  
741 changes associated with cell entry. Kirkegaard K, editor. *Journal of*  
742 *Virology*. American Society for Microbiology; 2015;89: 4143–4157.  
743 doi:10.1128/JVI.03101-14
- 744 8. Tsang SK, Danthi P, Chow M, Hogle JM. Stabilization of poliovirus by  
745 capsid-binding antiviral drugs is due to entropic effects. *J Mol Biol*.  
746 2000;296: 335–340. doi:10.1006/jmbi.1999.3483
- 747 9. Filman DJ, Syed R, Chow M, Macadam AJ, Minor PD, Hogle JM. Structural  
748 factors that control conformational transitions and serotype specificity in  
749 type 3 poliovirus. *The EMBO Journal*. John Wiley & Sons, Ltd; 1989;8:  
750 1567–1579. doi:10.1002/j.1460-2075.1989.tb03541.x
- 751 10. Belnap DM, Filman DJ, Trus BL, Cheng N, Booy FP, Conway JF, et al.  
752 Molecular tectonic model of virus structural transitions: the putative cell  
753 entry states of poliovirus. *Journal of Virology*. American Society for  
754 Microbiology; 2000;74: 1342–1354. doi:10.1128/JVI.74.3.1342-1354.2000
- 755 11. Fricks CE, Hogle JM. Cell-induced conformational change in poliovirus:  
756 externalization of the amino terminus of VP1 is responsible for liposome  
757 binding. *Journal of Virology*. American Society for Microbiology; 1990;64:  
758 1934–1945.
- 759 12. de Sena J, Mandel B. Studies on the in vitro uncoating of poliovirus II.  
760 Characteristics of the membrane-modified particle. *Virology*. Academic  
761 Press; 1977;78: 554–566. doi:10.1016/0042-6822(77)90130-1
- 762 13. Fenwick ML, Cooper PD. Early interactions between poliovirus and ERK  
763 cells: Some observations on the nature and significance of the rejected  
764 particles. *Virology*. Academic Press; 1962;18: 212–223. doi:10.1016/0042-  
765 6822(62)90007-7
- 766 14. Butan C, Filman DJ, Hogle JM. Cryo-Electron Microscopy Reconstruction  
767 Shows Poliovirus 135S Particles Poised for Membrane Interaction and  
768 RNA Release. *Journal of Virology*. American Society for Microbiology  
769 Journals; 2014;88: 1758–1770. doi:10.1128/JVI.01949-13
- 770 15. Curry S, Chow M, Hogle JM. The poliovirus 135S particle is infectious.  
771 *Journal of Virology*. American Society for Microbiology Journals; 1996;70:  
772 7125–7131.
- 773 16. Huang Y, Hogle JM, Chow M. Is the 135S Poliovirus Particle an  
774 Intermediate during Cell Entry? *Journal of Virology*. American Society for  
775 Microbiology Journals; 2000;74: 8757–8761. doi:10.1128/JVI.74.18.8757-  
776 8761.2000



- 777 17. Ren J, Wang X, Hu Z, Gao Q, Sun Y, Li X, et al. Picornavirus uncoating  
778 intermediate captured in atomic detail. *Nature Communications*. 2013;4:  
779 1929. doi:10.1038/ncomms2889
- 780 18. Chow M, Newman JFE, Filman D, Hogle JM, Rowlands DJ, Brown F.  
781 Myristylation of picornavirus capsid protein VP4 and its structural  
782 significance. *Nature*. Nature Publishing Group; 1987;327: 482–486.  
783 doi:10.1038/327482a0
- 784 19. Tuthill TJ, Bubeck D, Rowlands DJ, Hogle JM. Characterization of Early  
785 Steps in the Poliovirus Infection Process: Receptor-Decorated Liposomes  
786 Induce Conversion of the Virus to Membrane-Anchored Entry-Intermediate  
787 Particles. *Journal of Virology*. American Society for Microbiology Journals;  
788 2006;80: 172–180. doi:10.1128/JVI.80.1.172-180.2006
- 789 20. Strauss M, Levy HC, Bostina M, Filman DJ, Hogle JM. RNA transfer from  
790 poliovirus 135S particles across membranes is mediated by long umbilical  
791 connectors. *Journal of Virology*. American Society for Microbiology;  
792 2013;87: 3903–3914. doi:10.1128/JVI.03209-12
- 793 21. Groppelli E, Levy HC, Sun E, Strauss M, Nicol C, Gold S, et al.  
794 Picornavirus RNA is protected from cleavage by ribonuclease during virion  
795 uncoating and transfer across cellular and model membranes. Sarnow P,  
796 editor. *PLoS Pathog*. Public Library of Science; 2017;13: e1006197.  
797 doi:10.1371/journal.ppat.1006197
- 798 22. Li Q, Yafal AG, Lee YM, Hogle J, Chow M. Poliovirus neutralization by  
799 antibodies to internal epitopes of VP4 and VP1 results from reversible  
800 exposure of these sequences at physiological temperature. *Journal of*  
801 *Virology*. American Society for Microbiology; 1994;68: 3965–3970.
- 802 23. Roivainen M, Piirainen L, Rysä T, Närvänen A, Hovi T. An  
803 immunodominant N-terminal region of VP1 protein of poliovirion that is  
804 buried in crystal structure can be exposed in solution. *Virology*. 1993;195:  
805 762–765.
- 806 24. Lin J, Lee LY, Roivainen M, Filman DJ, Hogle JM, Belnap DM. Structure of  
807 the Fab-labeled “breathing” state of native poliovirus. *Journal of Virology*.  
808 American Society for Microbiology; 2012;86: 5959–5962.  
809 doi:10.1128/JVI.05990-11
- 810 25. Strauss M, Schotte L, Karunatilaka KS, Filman DJ, Hogle JM. Cryo-  
811 electron Microscopy Structures of Expanded Poliovirus with VHHs Sample  
812 the Conformational Repertoire of the Expanded State. Dermody TS, editor.  
813 *Journal of Virology*. American Society for Microbiology Journals; 2017;91:  
814 e01443–16. doi:10.1128/JVI.01443-16

- 815 26. Levy HC, Bostina M, Filman DJ, Hogle JM. Catching a virus in the act of  
816 RNA release: a novel poliovirus uncoating intermediate characterized by  
817 cryo-electron microscopy. *Journal of Virology*. American Society for  
818 Microbiology; 2010;84: 4426–4441. doi:10.1128/JVI.02393-09
- 819 27. Lin J, Cheng N, Chow M, Filman DJ, Steven AC, Hogle JM, et al. An  
820 externalized polypeptide partitions between two distinct sites on genome-  
821 released poliovirus particles. *Journal of Virology*. American Society for  
822 Microbiology; 2011;85: 9974–9983. doi:10.1128/JVI.05013-11
- 823 28. Shingler KL, Yoder JL, Carnegie MS, Ashley RE, Makhov AM, Conway JF,  
824 et al. The enterovirus 71 A-particle forms a gateway to allow genome  
825 release: a cryoEM study of picornavirus uncoating. Rey FA, editor. *PLoS*  
826 *Pathog*. 2013;9: e1003240. doi:10.1371/journal.ppat.1003240
- 827 29. Zhu L, Sun Y, Fan J, Zhu B, Cao L, Gao Q, et al. Structures of  
828 Coxsackievirus A10 unveil the molecular mechanisms of receptor binding  
829 and viral uncoating. *Nature Communications*. Nature Publishing Group;  
830 2018;9: 4985. doi:10.1038/s41467-018-07531-0
- 831 30. Butan C, Filman DJ, Hogle JM. Cryo-electron microscopy reconstruction  
832 shows poliovirus 135S particles poised for membrane interaction and RNA  
833 release. *Journal of Virology*. American Society for Microbiology; 2014;88:  
834 1758–1770. doi:10.1128/JVI.01949-13
- 835 31. Bubeck D, Filman DJ, Cheng N, Steven AC, Hogle JM, Belnap DM. The  
836 structure of the poliovirus 135S cell entry intermediate at 10-angstrom  
837 resolution reveals the location of an externalized polypeptide that binds to  
838 membranes. *Journal of Virology*. American Society for Microbiology;  
839 2005;79: 7745–7755. doi:10.1128/JVI.79.12.7745-7755.2005
- 840 32. Organtini LJ, Makhov AM, Conway JF, Hafenstein S, Carson SD. Kinetic  
841 and structural analysis of coxsackievirus B3 receptor interactions and  
842 formation of the A-particle. *Journal of Virology*. 2014;88: 5755–5765.  
843 doi:10.1128/JVI.00299-14
- 844 33. Kaplan G, Freistadt MS, Racaniello VR. Neutralization of poliovirus by cell  
845 receptors expressed in insect cells. *Journal of Virology*. American Society  
846 for Microbiology (ASM); 1990;64: 4697–4702.
- 847 34. Gómez Yafal AG, Kaplan G, Racaniello VR, Hogle JM. Characterization of  
848 poliovirus conformational alteration mediated by soluble cell receptors.  
849 *Virology*. 1993;197: 501–505. doi:10.1006/viro.1993.1621
- 850 35. Wetz K, Kucinski T. Influence of different ionic and pH environments on  
851 structural alterations of poliovirus and their possible relation to virus  
852 uncoating. *Journal of General Virology*. Microbiology Society; 1991;72:  
853 2541–2544. doi:10.1099/0022-1317-72-10-2541

- 854 36. Bubeck D, Filman DJ, Hogle JM. Cryo-electron microscopy reconstruction  
855 of a poliovirus-receptor-membrane complex. *Nature Structural & Molecular*  
856 *Biology*. Nature Publishing Group; 2005;12: 615–618.  
857 doi:10.1038/nsmb955
- 858 37. Tsang SK, McDermott BM, Racaniello VR, Hogle JM. Kinetic analysis of  
859 the effect of poliovirus receptor on viral uncoating: the receptor as a  
860 catalyst. *Journal of Virology*. American Society for Microbiology Journals;  
861 2001;75: 4984–4989. doi:10.1128/JVI.75.11.4984-4989.2001
- 862 38. Panjwani A, Strauss M, Gold S, Wenham H, Jackson T, Chou JJ, et al.  
863 Capsid protein VP4 of human rhinovirus induces membrane permeability  
864 by the formation of a size-selective multimeric pore. Rey FA, editor. *PLoS*  
865 *Pathog*. Public Library of Science; 2014;10: e1004294.  
866 doi:10.1371/journal.ppat.1004294
- 867 39. Tosteson MT, Chow M. Characterization of the ion channels formed by  
868 poliovirus in planar lipid membranes. *Journal of Virology*. American Society  
869 for Microbiology; 1997;71: 507–511.
- 870 40. Danthi P, Tosteson M, Li Q-H, Chow M. Genome Delivery and Ion Channel  
871 Properties Are Altered in VP4 Mutants of Poliovirus. *Journal of Virology*.  
872 American Society for Microbiology Journals; 2003;77: 5266–5274.  
873 doi:10.1128/JVI.77.9.5266-5274.2003
- 874 41. Kirkegaard K. Mutations in Vp1 of Poliovirus Specifically Affect Both  
875 Encapsidation and Release of Viral RNA. *Journal of Virology*. American  
876 Society for Microbiology (ASM); 1990;64: 195–206.
- 877 42. Xu L, Zheng Q, Li S, He M, Wu Y, Li Y, et al. Atomic structures of  
878 Coxsackievirus A6 and its complex with a neutralizing antibody. *Nature*  
879 *Communications*. Nature Publishing Group; 2017;8: 505.  
880 doi:10.1038/s41467-017-00477-9
- 881 43. Brandenburg B, Lee LY, Lakadamyali M, Rust MJ, Zhuang X, Hogle JM.  
882 Imaging Poliovirus Entry in Live Cells. Sugden B, editor. *Plos Biol*. Public  
883 Library of Science; 2007;5: e183. doi:10.1371/journal.pbio.0050183
- 884 44. Lyu K, Ding J, Han J-F, Zhang Y, Wu X-Y, He Y-L, et al. Human  
885 enterovirus 71 uncoating captured at atomic resolution. Hutt-Fletcher L,  
886 editor. *Journal of Virology*. 5 ed. American Society for Microbiology  
887 Journals; 2014;88: 3114–3126. doi:10.1128/JVI.03029-13
- 888 45. McGregor S, Mayor HD. Biophysical and Biochemical Studies on  
889 Rhinovirus and Poliovirus II. Chemical and Hydrodynamic Analysis of the  
890 Rhinovirion. *Journal of Virology*. American Society for Microbiology  
891 Journals; 1971;7: 41–46. doi:10.1146/annurev-biophys-062215-010822

- 892 46. Zivanov J, Nakane T, Forsberg BO, Kimanius D, Hagen WJ, Lindahl E, et  
893 al. New tools for automated high-resolution cryo-EM structure  
894 determination in RELION-3. *eLife Sciences*. 2018;7: 163.  
895 doi:10.7554/eLife.42166
- 896 47. Zivanov J, Nakane T, Scheres SHW. A Bayesian approach to beam-  
897 induced motion correction in cryo-EM single-particle analysis. *IUCrJ*.  
898 2019;6: 5–17. doi:10.1107/S205225251801463X
- 899 48. Zhang K. Gctf: Real-time CTF determination and correction. *Journal of*  
900 *Structural Biology*. 2016;193: 1–12. doi:10.1016/j.jsb.2015.11.003
- 901 49. Wagner T, Merino F, Stabrin M, Moriya T, Antoni C, Apelbaum A, et al.  
902 SPHIRE-crYOLO is a fast and accurate fully automated particle picker for  
903 cryo-EM. *Commun Biol*. 2019;2: 218. doi:10.1038/s42003-019-0437-z
- 904 50. Frank J, Radermacher M, Penczek P, Zhu J, Li Y, Ladjadj M, et al.  
905 SPIDER and WEB: processing and visualization of images in 3D electron  
906 microscopy and related fields. *Journal of Structural Biology*. 1996;116:  
907 190–199. doi:10.1006/jsbi.1996.0030
- 908 51. Strauss M, Schotte L, Thys B, Filman DJ, Hogle JM. Five of Five VHHs  
909 Neutralizing Poliovirus Bind the Receptor-Binding Site. Dermody TS,  
910 editor. *Journal of Virology*. American Society for Microbiology; 2016;90:  
911 3496–3505. doi:10.1128/JVI.03017-15
- 912 52. Emsley P, Cowtan K. Coot: model-building tools for molecular graphics.  
913 *Acta Crystallogr Sect D Biol Crystallogr*. International Union of  
914 Crystallography; 2004;60: 2126–2132. doi:10.1107/S0907444904019158
- 915 53. Murshudov GN, Vagin AA, Dodson EJ. Refinement of macromolecular  
916 structures by the maximum-likelihood method. *Acta Crystallogr Sect D Biol*  
917 *Crystallogr*. International Union of Crystallography; 1997;53: 240–255.  
918 doi:10.1107/S0907444996012255
- 919 54. Afonine PV, Poon BK, Read RJ, Sobolev OV, Terwilliger TC, Urzhumtsev  
920 A, et al. Real-space refinement in PHENIX for cryo-EM and  
921 crystallography. *Acta Crystallogr D Struct Biol*. International Union of  
922 Crystallography; 2018;74: 531–544. doi:10.1107/S2059798318006551
- 923 55. Adams PD, Afonine PV, Bunkóczi G, Chen VB, Davis IW, Echols N, et al.  
924 PHENIX: a comprehensive Python-based system for macromolecular  
925 structure solution. *Acta Crystallogr Sect D Biol Crystallogr*. International  
926 Union of Crystallography; 2010;66: 213–221.  
927 doi:10.1107/S0907444909052925
- 928 56. Pettersen EF, Goddard TD, Huang CC, Couch GS, Greenblatt DM, Meng  
929 EC, et al. UCSF Chimera?A visualization system for exploratory research

930 and analysis. *J Comput Chem.* 2004;25: 1605–1612.  
931 doi:10.1002/jcc.20084

932 57. Goddard TD, Huang CC, Meng EC, Pettersen EF, Couch GS, Morris JH, et  
933 al. UCSF ChimeraX: Meeting modern challenges in visualization and  
934 analysis. *Protein Science.* 2018;27: 14–25. doi:10.1002/pro.3235

935 58. Morin A, Eisenbraun B, Key J, Sanschagrin PC, Timony MA, Ottaviano M,  
936 et al. Collaboration gets the most out of software. *eLife Sciences.* eLife  
937 Sciences Publications Limited; 2013;2: e01456. doi:10.7554/eLife.01456

938

## 939 **Figure Legends**

940

941 **Figure 1: Anti-VP1 antibody trapped expanded particle** (a.) Top row: The 3D  
942 classes from the dataset, with undecorated 160S particles (left), the anti-VP1  
943 mAb decorated 135S-like particle (middle, orange border) and the mAb  
944 decorated empty particle (right, yellow border). Second row: Radially colored  
945 isosurface representations of the refined particles are shown at a high contour,  
946 where the holes at the 2-fold are clearly observed. Third row, isosurface  
947 representations of the mAb-decorated 135S (center) and 80S particles (right)  
948 contoured at a lower level showing the diffuse density attributable to the bottom  
949 half of the Fab part of the mAb. (b) Density for an asymmetric focus class  
950 calculated from the mAb decorated 80S particle is depicted in the context of the  
951 2-fold related VP2 subunits (yellow) and a model of a Fab (pink). The tube-like  
952 density for the N-terminus of VP1 (arrow) is seen above one of the two 2-fold  
953 related VP2 helices.

954

955 **Figure 2: Anti-VP1 antibody trapped genome containing particle (m135) is**  
956 **similar to the canonical 135S particle.** (a.) Cage density depiction of the mAb-  
957 decorated m135 structure in the vicinity of the 2-fold axes showing the rod  
958 shaped density for the lower half of the Fab portion of the mAb and the better  
959 ordered density for the capsid proteins of the virus (b.) The canonical poliovirus  
960 protomer consisting of VP1 (blue), VP2 (yellow) and VP3 (red) is shown  
961 juxtaposed with 5-fold related copies of VP1 (cyan) and VP2 (gold). The cyan,  
962 gold, and red copies together form the “5-3-3 triangle” having one 5-fold and two  
963 3-fold symmetry axes at its corners. The quasi 3-fold lies at the center of this  
964 triangle. Panels (b) and (c) are viewed from outside the virus. (c.) The N-terminus  
965 of VP1 (dark blue) is seen exiting the virus capsid through the quasi 3-fold hole.  
966 To accommodate this, the GH loop of VP3 (labeled) becomes rearranged and  
967 partially disordered. Panels (d-f) are viewed from inside the virus. (d.) The exiting  
968 N-terminus (dark blue) contacts the tip of the VP2 bottom loop (labeled) (e.) The  
969 bottom loop of VP2, in m135 (yellow), is rearranged relative to native VP2  
970 (magenta) (f.) In m135, the C-terminus of VP2 (dark yellow) becomes ordered on  
971 the capsid inner surface, rather than exiting at the 2-fold, as in native virus  
972 (magenta).

973

974 **Figure 3: Receptor-catalyzed, and heat-triggered 135S particles (r/h135).** (a.)  
975 Radially colored isosurface rendering of the “early” 135S particle at a high  
976 contour (left panel) reveals an opening at the 2-fold axis. The panel on the right is  
977 shown at a lower contour level with a clipping plane inserted to highlight the re-  
978 organised density inside the capsid. These two panels are based on the r135  
979 map, because the two structures are virtually identical (b.) Close up of the quasi-  
980 3-fold region. Density for the GH loop of VP3, overlaid on the model, is very  
981 similar in the r135 (blue) and h135 (purple) maps. In this conformation, the GH  
982 loop of VP3 plugs the quasi-3-fold hole. (c.) Stereo views compare the GH loops  
983 of VP3 from the r135 (red), m135 (salmon), and native (orange) structures. The  
984 r135 conformation is more similar to the native conformation, as opposed to the  
985 m135 model where the GH loop becomes more extended and forms new beta-  
986 sheet interactions with a radially-oriented segment of the VP3 D strand.

987

988 **Figure 4: Receptor catalyzed 135S particle incubated with the anti-VP1**  
989 **antibody at 25°C (r135+m25).** (a.) Radially colored isosurface rendering of the  
990 “late” 135S particle shown at high contour (left) to highlight the hole at the 2-fold  
991 axis and at a lower contour (right) to highlight binding of the Fab (pink) relative to  
992 the capsid (b.) The interaction between the Fab density and the capsid is better  
993 resolved following a focused classification centered around the 2-fold symmetry  
994 axis of the capsid. (c.) A focus map from (b.) compared with the m135 model,  
995 helps to visualize the N-terminus of VP1 (blue) exiting the capsid from the quasi-  
996 3-fold hole. The density in this region is poorly resolved in the icosahedral  
997 averaged reconstruction (d.) A focused class obtained from the screening data,  
998 using a cylindrical mask centered on the 2-fold axis. This map clearly shows a  
999 column of density that accommodates the first 20 amino acids of the N-terminus  
1000 of VP1 (blue). The helix bound to the top surface of VP2 (yellow) is stabilized in a  
1001 unique orientation by contacts with the Fab (pink). Clearly, the portions of VP2  
1002 that bind the base of the helix must be rearranged, in some unknown way that  
1003 differs from the native conformation of VP2 that is shown (yellow).

1004

1005 **Figure 5: Receptor catalyzed 135S particle incubated with the anti-VP1**  
1006 **antibody at 37°C (r135+m37).** (a.) Radially colored isosurface rendering of the  
1007 “late” 135S particle that is produced after receptor-catalyzed expanded virus is  
1008 incubated with anti-VP1 antibody at 37°C for 1h. (a.) The panel on the left is  
1009 contoured at a higher level to show surface details such as holes at the 2-fold  
1010 and density in the quasi-3-fold. At a lower contour (right), smeared density due to  
1011 Fab binding (beige) is apparent. (a. and b.) The Fab density in r135+m37  
1012 appears to be a super-position of the rod-shaped Fab density that extends over  
1013 the quasi-3-fold (as seen in m135) and the 2-fold-centered density (as seen in  
1014 the r135+m25 reconstruction). (c.) a close-up view of the showing the VP1 N-  
1015 terminus emerging at quasi-3-fold (compare Figs. 2c and 4c).

1016

1017 **Figure 6: Location of VP4 before and after capsid expansion.** Profile (top  
1018 panel) and face-on (lower panel) view of VP4 (green) in native, r135, m135 and

1019 empty states. The native orientation and location of VP4 has been preserved to  
1020 highlight the changes in the density, as the capsid expands. Prior to RNA  
1021 release, VP4 pentamers, somewhat rearranged, appear to remain at their original  
1022 radius, on the outer surface of the RNA ball, as the rest of the capsid expands  
1023 outward.

1024

1025 **Figure 7: Schematic of VP1 N-terminal stabilization in the r135+m25 state.**

1026 Four distinct areas in the N-terminal extension of VP1 (dashed blue curve) can  
1027 be stabilized by binding to the Fab (pink) and the viral capsid (grey). This overall  
1028 binding pattern is suggested by (i) the observation of residues 70-62 in the m135  
1029 complex; (ii) the expectation that amino acids from the 55-42 range (the epitope  
1030 for the anti-VP1 Ab) will bind to the underside of the anti-peptide mAb; (iii) the  
1031 anchoring of the N-terminal helix (around residue 21) to the top surface of VP2;  
1032 and (iv) the nonspecific stabilization of the amphipathic N-terminal helix along the  
1033 side of the Fab in a focus map. Although the pathway of the N-terminal extension  
1034 is unlikely to be unique, the diagram does help us to understand why the  
1035 increased prevalence of Fab moieties at the 2-fold hole (in r135+m25) is  
1036 evidence for the increased anchoring of the amphipathic helix (residues 1-21) on  
1037 the top surface of VP2, presumably stabilized by lower temperature and longer  
1038 incubation before the antibody is introduced.

1039

1040 **Figure S1: Resolution and quality of maps.** (a.) Representative, raw  
1041 micrographs of the datasets used in the analysis, (b.) Masked (continuous line)  
1042 and unmasked (dotted line) Fourier shell correlation plots of m135 (red), r135  
1043 (green), h135 (cyan), r135+m25 (blue) and r135+m37 (purple). At a 0.143 cut-off  
1044 level, the resolution estimates range from 2.8 to 3.6Å. (c.) Local resolution  
1045 estimates in all the maps were calculated using Relion and the distribution of  
1046 resolution values within in the masked region is plotted. (d.) In the best resolved  
1047 dataset (m135), individual amino acid side chains are easily discriminated.

1048

1049 **Figure S2: Binding of anti-VP1 mAb to the VP1 N-terminus and infectivity of**  
1050 **mAb released poliovirions** a.) The anti-VP1 antibody specifically recognizes

1051 and binds the N-terminus of VP1 only after the N-terminus has been externalized  
1052 at 39°C. Poliovirus particles were complexed with the antibody at room  
1053 temperature or at 39°C for 1.5 h and immunoprecipitated with magnetic Protein A  
1054 coated beads. After thorough washing of the beads to remove unbound material,  
1055 the samples were examined on SDS-PAGE gels. Lane 1, Ladder; lane 2, PV  
1056 particles only; lane 3, antibody; lane 4, soluble fraction of antibody plus 160S PV  
1057 after binding at RT; lane 5, pelleted fraction of antibody plus 160S PV after  
1058 binding at RT; lane 6, soluble fraction of antibody plus 160S PV after binding at  
1059 39°C; lane 7, pelleted fraction of antibody plus 160S PV after binding at 39°C.

1060 Bottom panel, silver staining of the gel to enhance the relatively weak VP4 signal  
1061 b.) Expanded poliovirus particles are infectious. Native (160S) poliovirus particles  
1062 previously incubated with anti-VP1 antibody at room temperature or at 39°C for  
1063 1.5 h were immunoprecipitated with magnetic Protein A coated beads. After  
1064 thorough washing of the beads to remove unbound material, the beads were

1065 freeze-thawed to release poliovirus particles. Released poliovirus was serially  
1066 diluted and plated on naïve Vero cells. After 36 h of incubation at 37°C, plaques  
1067 were visualized by staining with crystal violet.

1068

1069 **Figure S3: Visualising poliovirus VP1 N-terminus** (a.) Asymmetric focused  
1070 classes calculated for the r135+m25 dataset with percentage population per  
1071 class. Class3 is depicted in Fig. 4b-c. (b.) Difference density, shown here in  
1072 stereo, was calculated from previously published low-resolution reconstructions  
1073 of poliovirus 135S particles, either untreated or treated with V8 protease, which  
1074 cleaves at residue 31 of VP1. As a guide, we have superimposed an alpha  
1075 carbon model of r135+m25. The blue alpha helix (putatively residues 1-21 of  
1076 VP1) was fitted to a focused class of r135+m25 (as shown in Fig. 4d-e). Observe  
1077 that the putative VP1 helix model, bound to the top of VP2, is similar in position  
1078 and orientation to the previously reported difference map feature.

1079

1080

1081 **Table S1: Data collection parameters and refinement statistics.** \*The  
1082 refinement statistics for the r135+m25 model are shown with the placeholder Fab  
1083 and VP4 included as well as the capsid.

1084

1085

1086 **Table S2: List of residues that differ from the native structure.** \*Differently  
1087 ordered residues are those residues that significantly differ in position from the  
1088 native model (1HXS) following a least squares superposition of individual capsid  
1089 proteins.



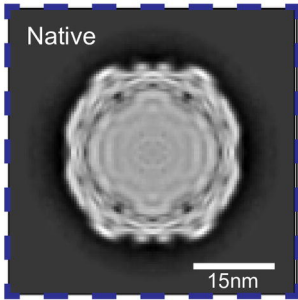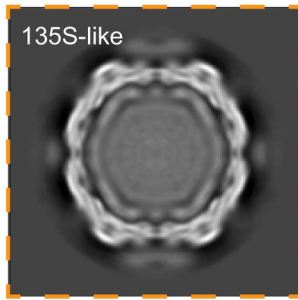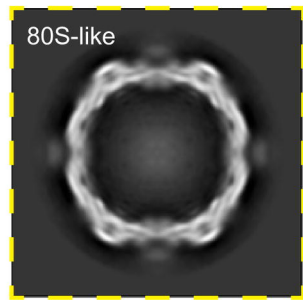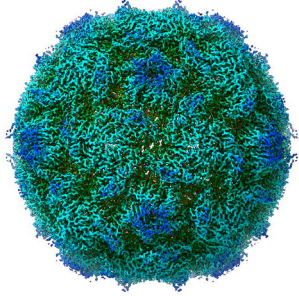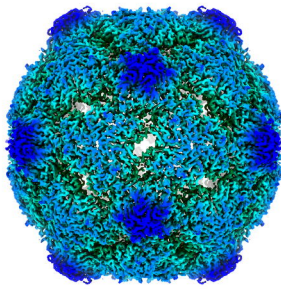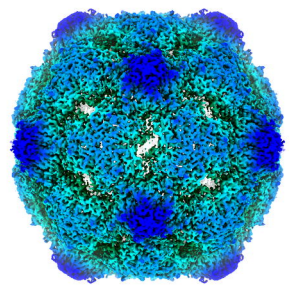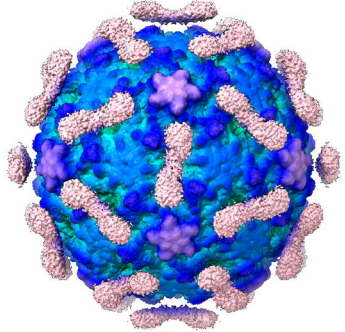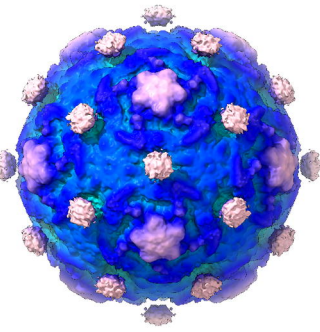

b.

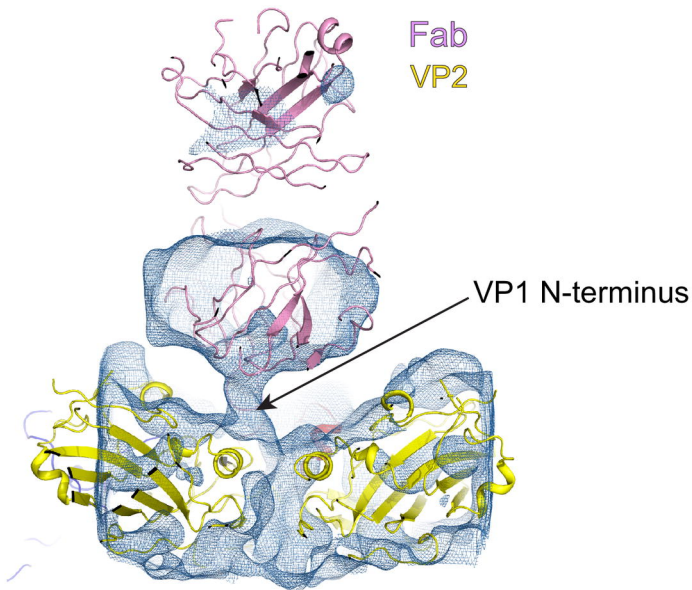

Figure 1: Anti-VP1 antibody trapped expanded particle

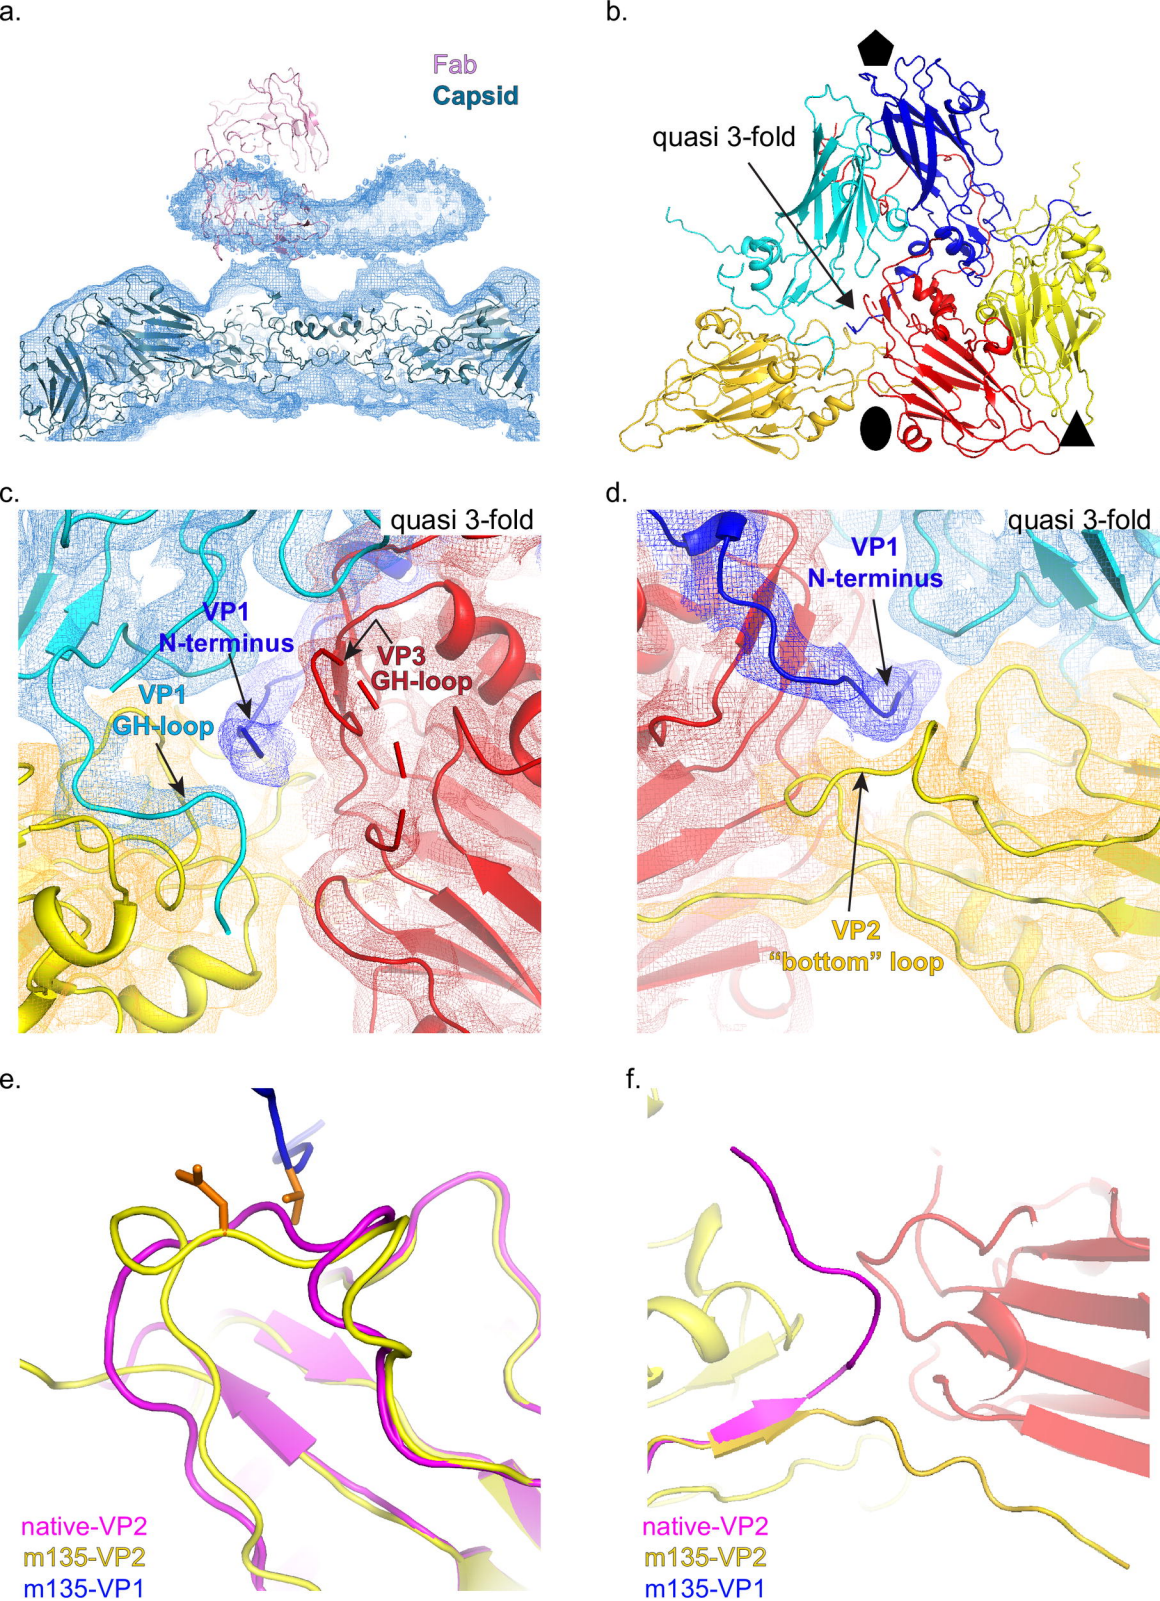

**Figure 2: Anti-VP1 antibody trapped genome containing particle (m135) is similar to the canonical 135S particle.**

a.

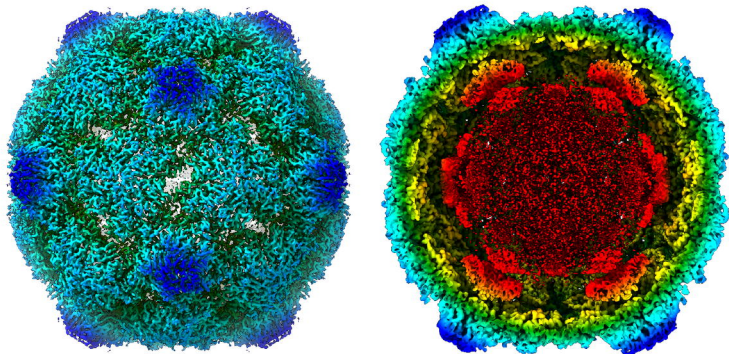

b.

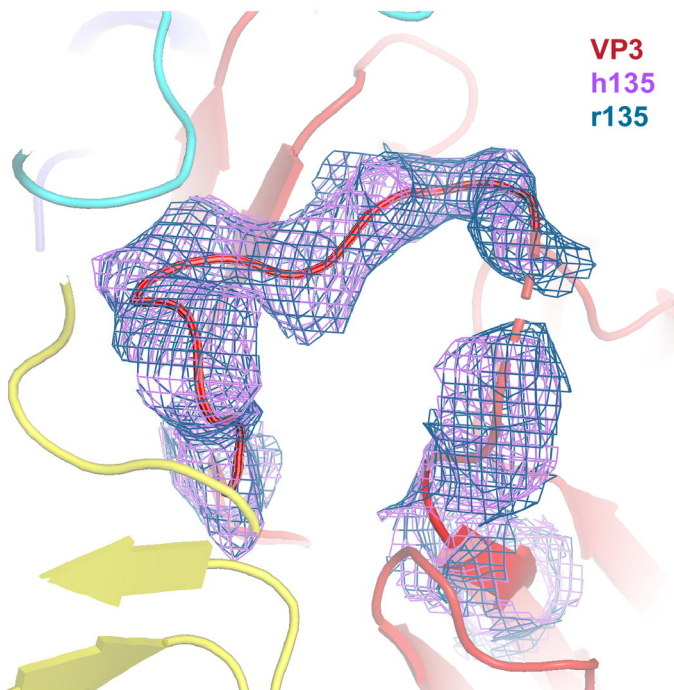

c.

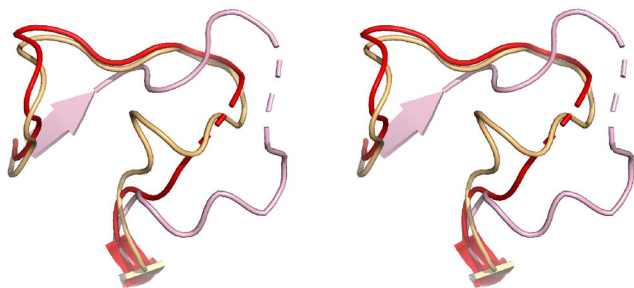

native r135 m135

Figure 3: Receptor-catalyzed, and heat-triggered 135S particles (r/h135).

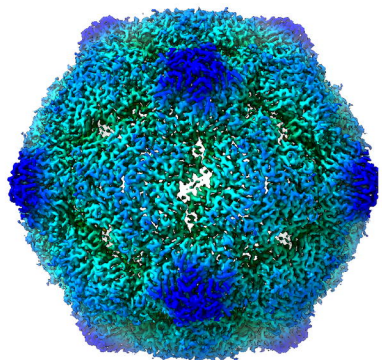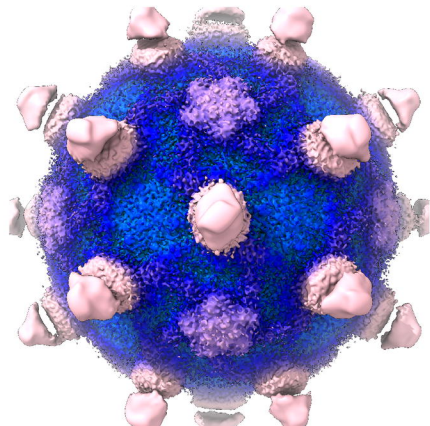

b.

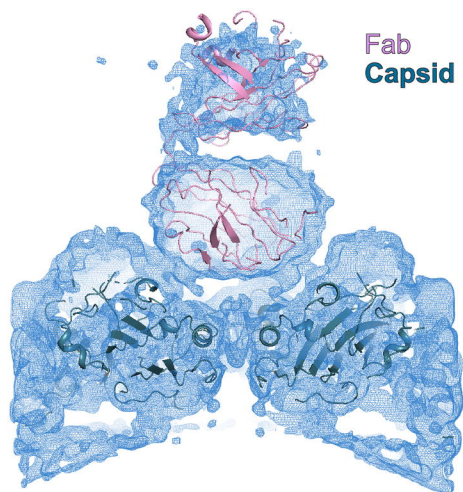

c.

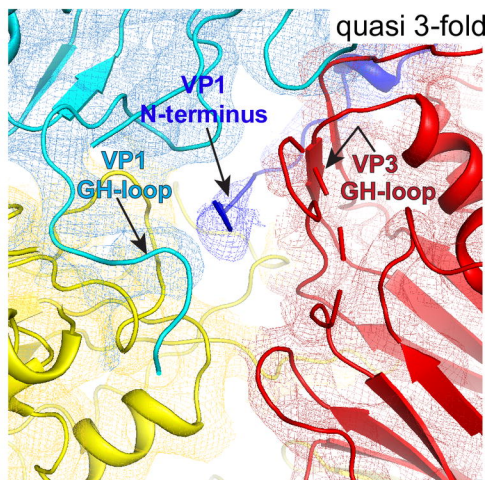

d.

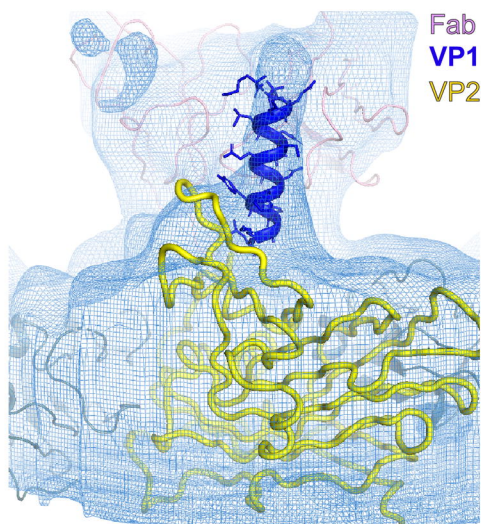

90°  
↻

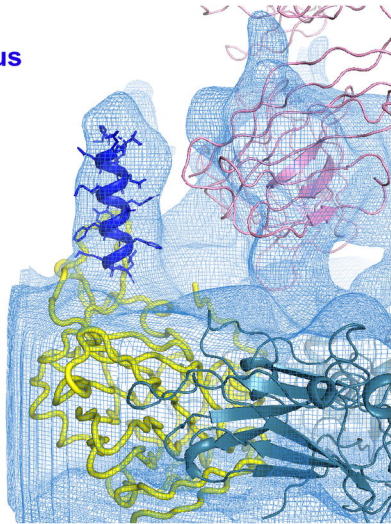

Figure 4: Receptor catalyzed 135S particle incubated with the anti-VP1 antibody at 25°C (r135+m25).

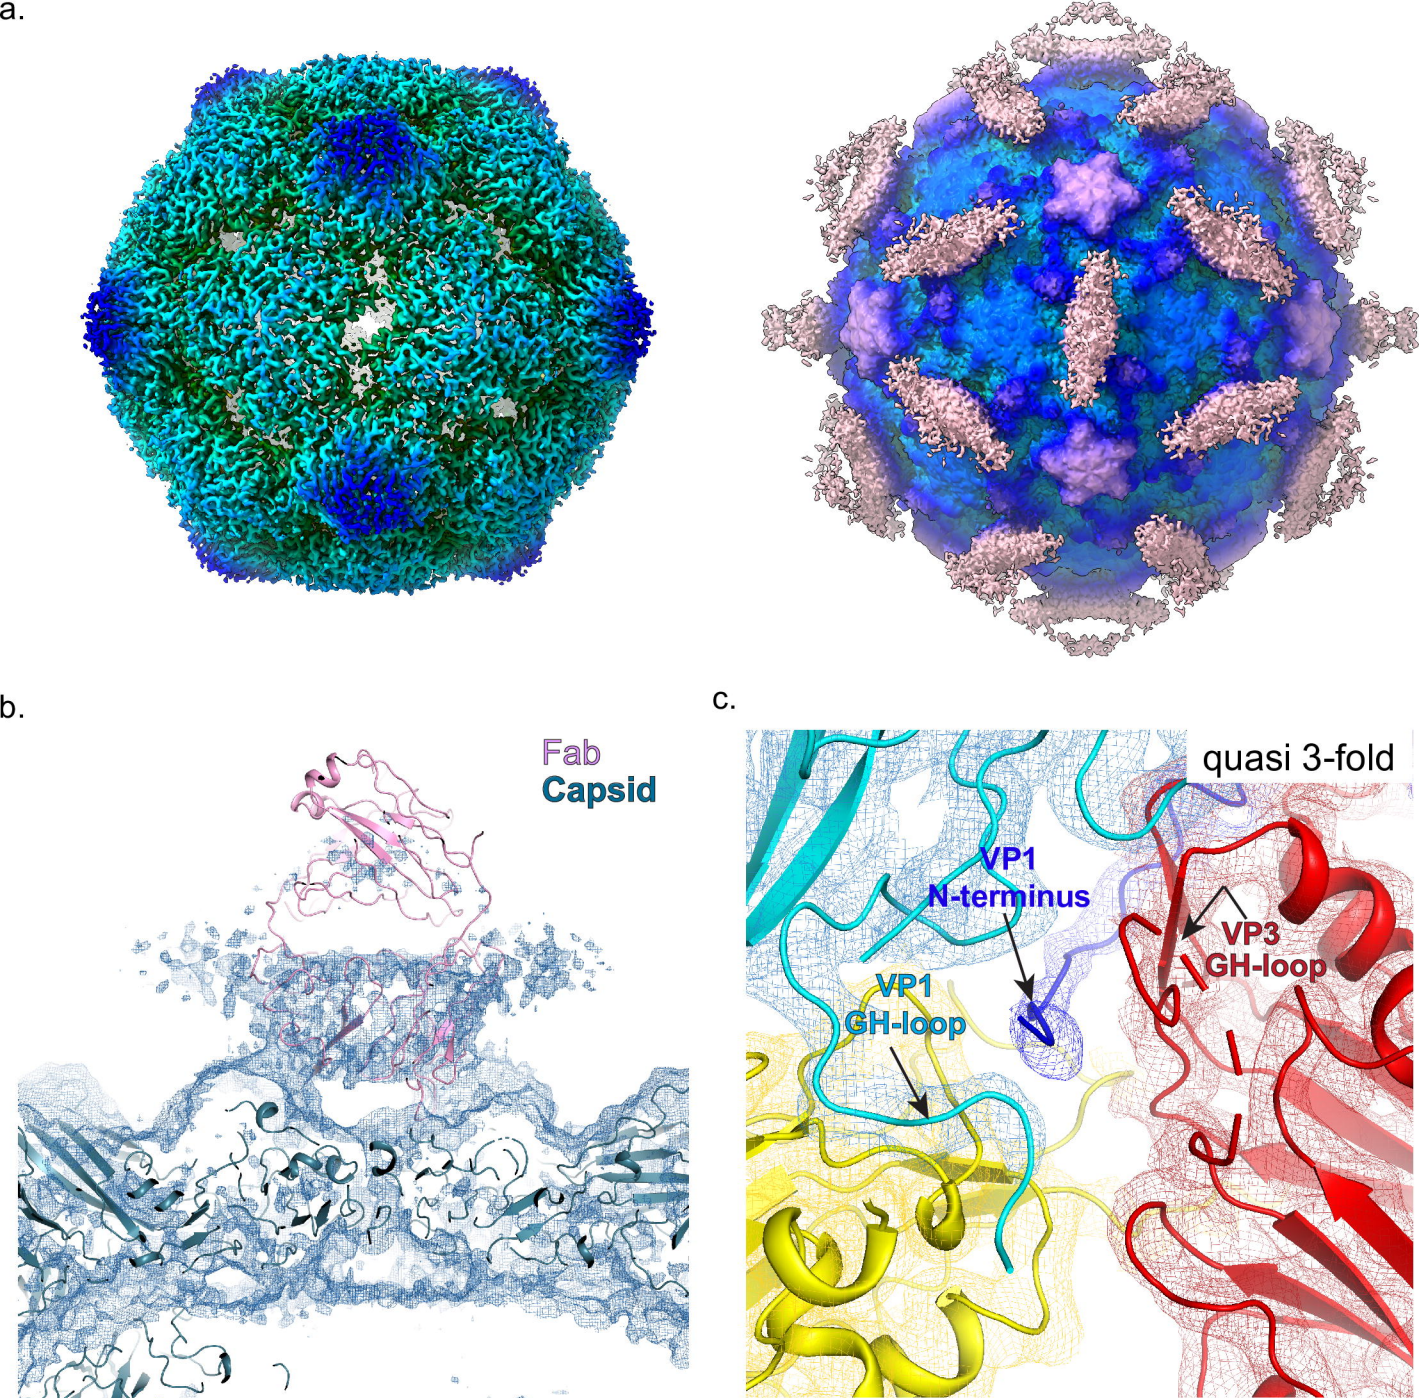

Figure 5: Receptor catalyzed 135S particle incubated with the anti-VP1 antibody at 37°C (r135+m37)

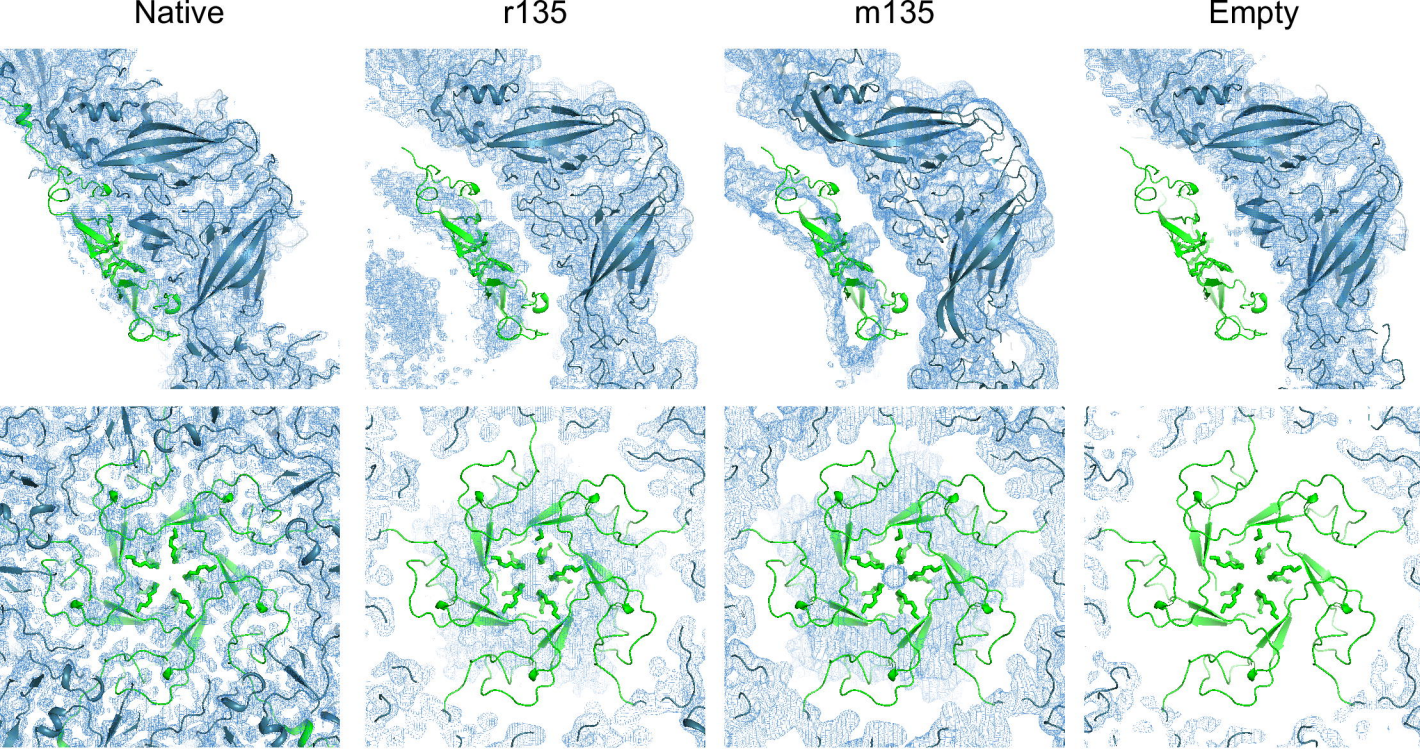

**Figure 6: Location of VP4 before and after capsid expansion.**

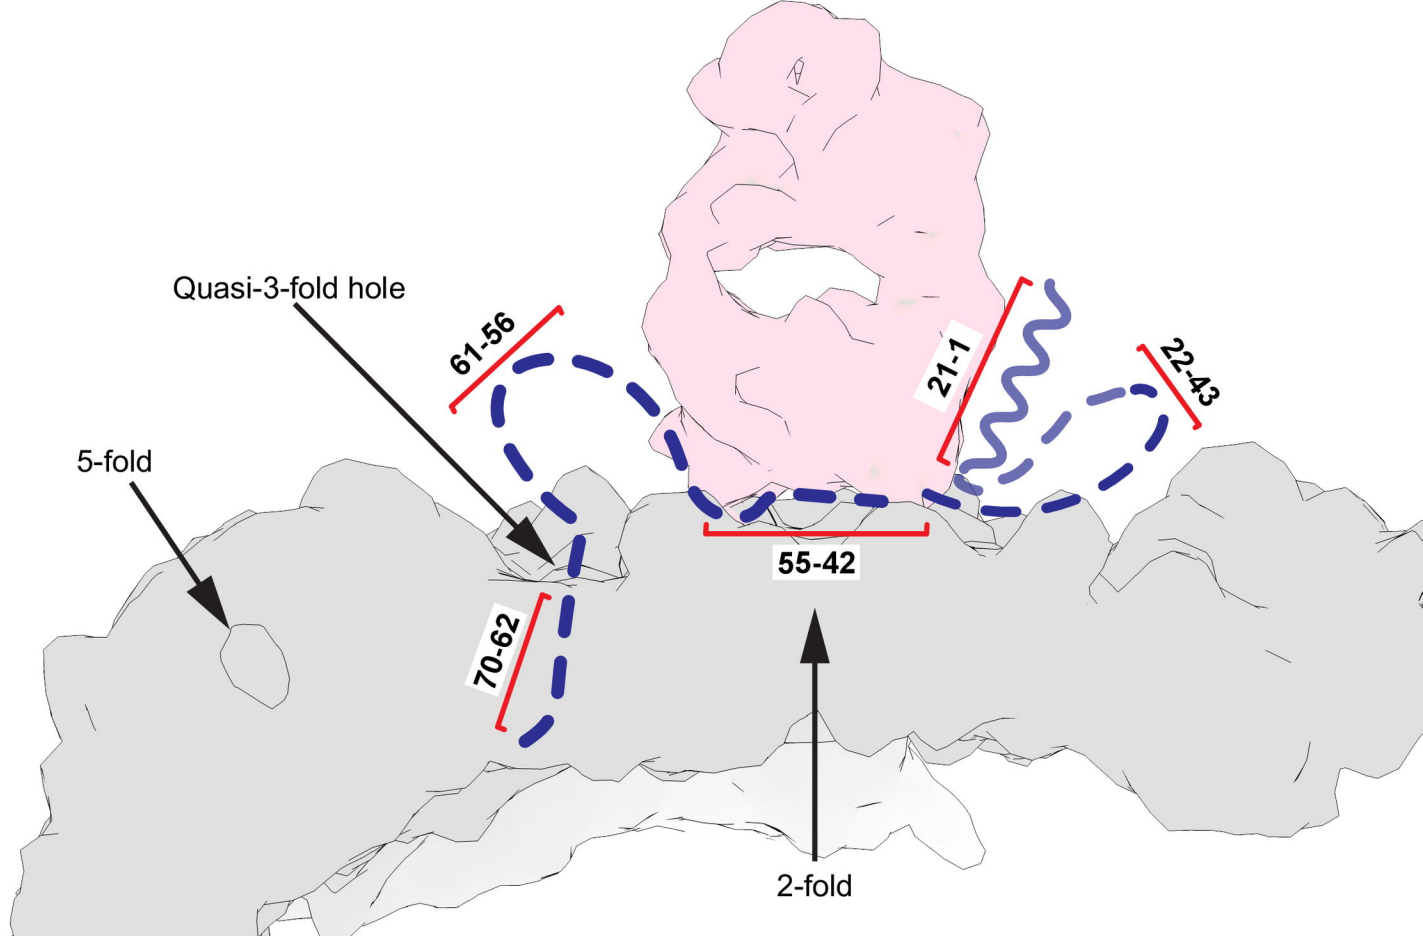

**Figure 7: Schematic of VP1 N-terminal stabilization in the r135+m25 state.**
